# Supplementary material for: Sensitivity of future water availability projections to Global Climate Model, evapotranspiration estimation method, and greenhouse gas emission scenario
Source: Copernicus journal article supplement (doi:10.5194/hess-2015-408), 2016-01-15
Supplement: Supplementary file 1 [file hess-2015-408-supplement.pdf]

1 **Supplemental figures**

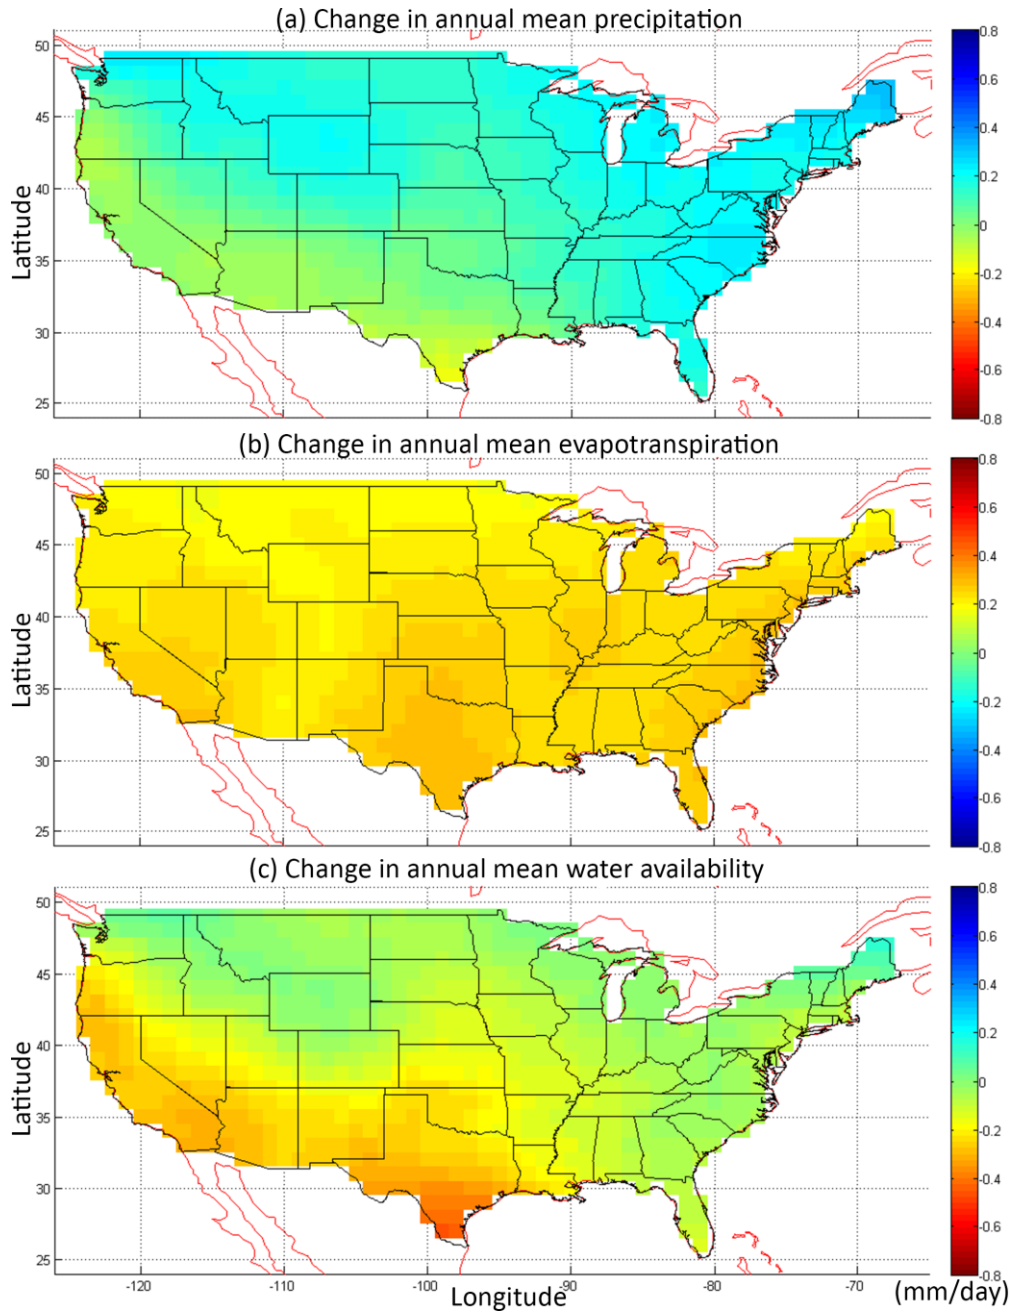

2

3 Fig. S-1 The change in the annual mean (a) P, (b) ET, and (c) P – ET over U.S. All units are  
4 mm/day and the trend is defined as the average of 2030-2060 minus that of 1950-2005.

5

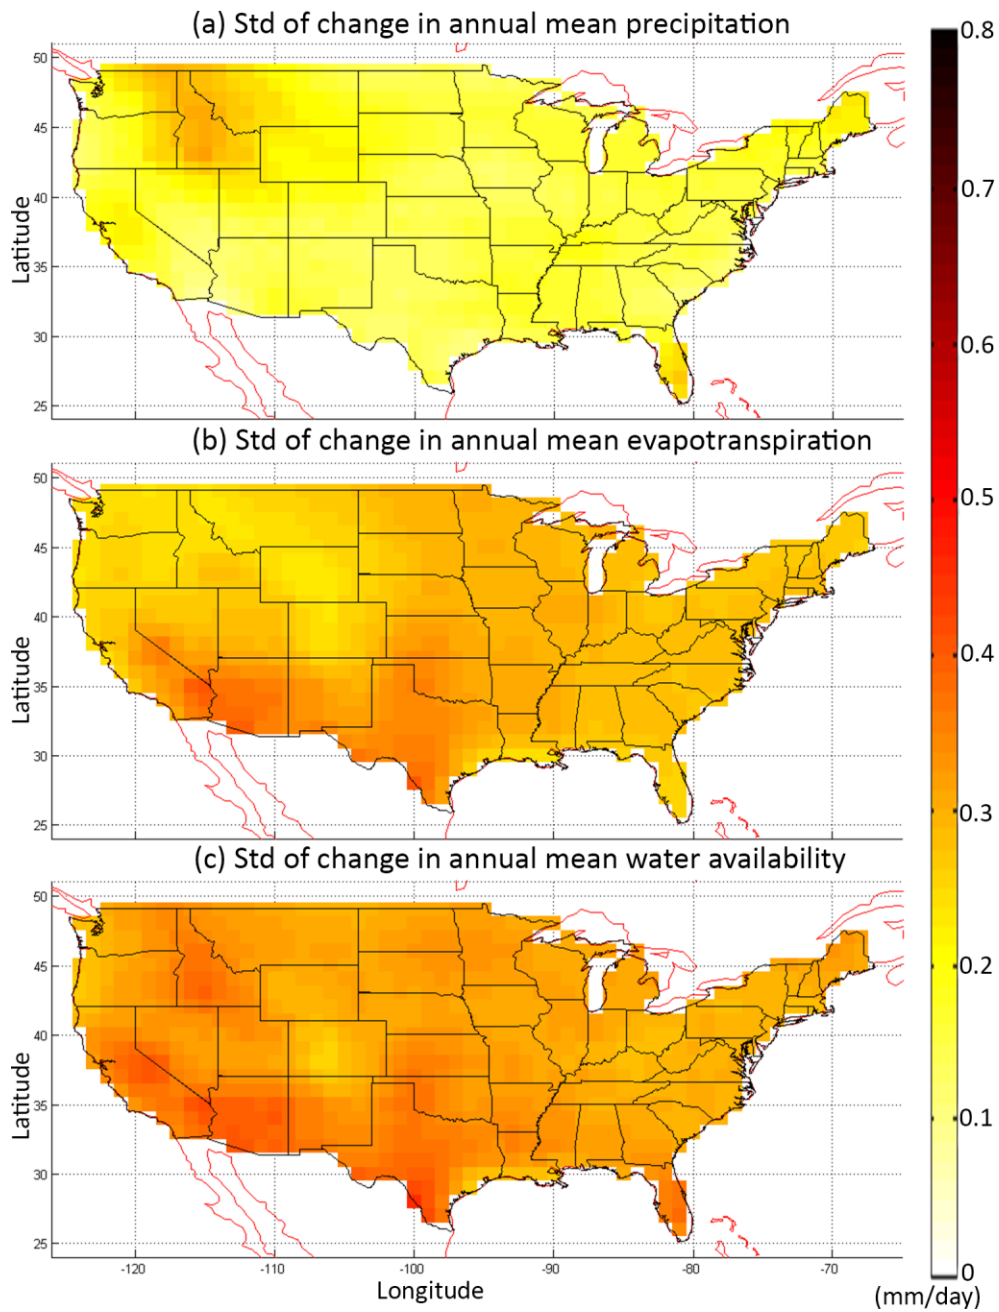

6

7 Fig. S-2 The standard deviation of the change in the annual mean (a) P, (b) ET, and (c) P – ET  
 8 over U.S. All units are mm/day and the trend is defined as the average of 2030-2060 minus that  
 9 of 1950-2005.

10

11
