# Supplementary material for: Sensitivity of future water availability projections to Global Climate Model, evapotranspiration estimation method, and greenhouse gas emission scenario
Source: Copernicus journal article supplement (doi:10.5194/hess-2015-408), 2016-01-15
Supplement: Supplementary file [file 02_Manuscript_.pdf › 02_Manuscript_.pdf]

# **Sensitivity of future Continental United States water deficit projections to General Circulation Model, evapotranspiration estimation method, and greenhouse gas emission scenario**

## **Abstract**

Projecting water deficit under various possible future climate scenarios depends on the choice of General Circulation Model (GCM), reference evapotranspiration ( $ET_0$ ) estimation method and Representative Concentration Pathway (RCP) trajectory. The relative contribution of each of these factors must be evaluated in order to choose an appropriate ensemble of future scenarios for water resources planning. In this study variance-based global sensitivity analysis and Monte Carlo filtering were used to evaluate the relative sensitivity of projected changes in precipitation (P),  $ET_0$  and water deficit (defined here as  $P - ET_0$ ) to choice of GCM,  $ET_0$  estimation method and RCP trajectory over the continental United States (US) for two distinct future periods: 2030-2060 (future period 1) and 2070-2100 (future period 2). A total of 9 GCMs, 10  $ET_0$  methods and 3 RCP trajectories were used to quantify the range of future projections and estimate the relative sensitivity of future projections to each of these factors. In general, for all regions of the Continental US, changes in future precipitation are most sensitive to the choice of GCM, while changes in future  $ET_0$  are most sensitive to the choice of  $ET_0$  estimation method. For changes in future water deficit, the choice of GCM is the most influential factor in the cool season (Dec – Mar) and the choice of  $ET_0$  estimation method is most important in the warm season (May – Oct) for all regions except the South East US where GCM and  $ET_0$  have approximately equal influence throughout most of the year. Although the choice of RCP trajectory is generally less important than the choice of GCM or  $ET_0$  method, the impact of RCP trajectory increases in future period 2 over future period 1 for all factors. Monte Carlo filtering results indicate that particular GCMs and  $ET_0$  methods drive the projection of wetter or drier future conditions much more than RCP trajectory; however the set of GCMs and  $ET_0$  methods that produce wetter or drier projections varies substantially by region. Results of this study indicate that, in addition to using an ensemble of GCMs and several RCP trajectories, a range of

regionally-relevant  $ET_0$  estimation methods should be used to develop a robust range of future conditions for water resource planning under climate change.

## 1. Introduction

Climate change will result in significant impacts on hydrologic processes. The 2014 Fifth Assessment Report (AR5) of the Intergovernmental Panel on Climate Change (IPCC) reported that climate change will significantly affect future precipitation (P), temperature (T) and reference evapotranspiration ( $ET_0$ ) and these changes will affect the quantity and quality of water resources. The most recent report of the National Climate Assessment and Development Advisory Committee (NCADAC, 2013) indicated that the average annual temperature in the United States (US) has increased by 0.7 °C to 0.9 °C since record keeping began in 1895 and is expected to continue to rise (Georgakakos et al., 2014; Walsh et al., 2014). The NCADAC report also indicated that Coupled Model Intercomparison Project 5 (CMIP5) General Circulation Model (GCM) precipitation projections show a consistent increase in Alaska and the far north of the continental US and a consistent decrease in the far Southwest US, but that GCM projections are inconsistent in the precipitation transition zone of the US continent. The uncertainty in climate change projections makes actionable water resources planning difficult in many regions. In order to predict changes in the hydrologic cycle, and future water supply and demand, estimates of changes in P, T and  $ET_0$  must be evaluated on a regional basis, and the uncertainty of these estimates must be quantified (Ishak et al., 2010).

Previous research has evaluated existing and potential future spatiotemporal changes in P, T and  $ET_0$  for various regions around the globe (e.g. Chaouche et al., 2010; Chong-Hai and Ying, 2012; Johnson and Sharma, 2009; Kharin et al., 2013; Maurer and Hidalgo, 2008; Quintana Seguí et al., 2010; Sung et al., 2012; Thomas, 2000; Wang et al., 2013; Xu et al., 2006). It is well known that future GCM projections of temperature and precipitation vary significantly due to both the different radiative forcing assumptions of carbon dioxide scenarios (e.g. CMIP3 Special Report on Emissions Scenarios (SRES) and CMIP5 Representative Concentration Pathways (RCP trajectories)) and different GCM model physics (Hawkins and Sutton, 2009, 2010). Future  $ET_0$  projections have been shown to depend on  $ET_0$  estimation methods in addition

to GCMs. For example Kingston et al. (2009) used 5 GCMs from the CMIP3 climate projections and 6 different  $ET_0$  equations to estimate global  $ET_0$  and found that the choice of  $ET_0$  method contributes to different projections of the future state of water resources which varies by region. They found that the Hamon and Jensen-Haise  $ET_0$  estimates showed the greatest changes in both humid and arid regions while the Penman-Monteith and Priestley-Taylor estimates frequently showed smallest change. Similarly McAfee (2013) used three  $ET_0$  equations with 17 CMIP3 GCMs to evaluate the uncertainty of future global  $ET_0$  projections and found that the Hamon equation showed more significant and consistently positive trends in  $ET_0$  compared to the Priestley-Taylor and Penman methods.

Models developed to estimate future water supply and demand as a result of projected climate change use many different types of  $ET_0$  estimation methods (Zhao et al., 2013). Because the choice of  $ET_0$  estimation method may be as important as the choice of GCM or RCP trajectory, better understanding of the contribution of each of these factors to the overall prediction uncertainty of future water availability or water deficit is necessary (Taylor et al., 2013). Kay and Davies (2008) compared the performance of the Penman-Monteith equation and a simple temperature-based  $ET_0$  method using climate data from five global and eight regional climate models over Britain. They found that the two methods showed very different changes in  $ET_0$  for the period 2071-2100 under the A2 emission scenario, and different flow predictions for three catchments when the data were used to force a rainfall-runoff model. Kay and Davies results suggest that hydrological prediction uncertainty due to  $ET_0$  formulation was smaller than that due to GCM structure or RCM structure for their study region. Bae et al. (2011) evaluated the uncertainty contributed by choice of GCM and hydrologic model for the Chungju Dam basin, Korea. They found that hydrologic model structural differences contributed greater uncertainty than GCM selection to winter runoff prediction. Koedyk and Kingston (2016) found that for the Waikaia River, New Zealand  $ET_0$  method contributed more uncertainty than GCM selection when predicting  $ET_0$ , but that runoff predictions were more sensitive to GCMs than to  $ET_0$  methods. Thompson et al. (2014) evaluated the effect of using different GCMs and different  $ET_0$  methods on discharge predictions for the Mekong River in Southeast Asia and found that GCM-related uncertainty was greater than the  $ET_0$  method related uncertainty.

Our study adds to the literature by comprehensively evaluating the relative sensitivity of future P,  $ET_0$  and water deficit (defined here as  $P - ET_0$ ) projections to choice of GCM,  $ET_0$  method and RCP trajectory over the continental US. Variance-based global sensitivity analysis (Saltelli et al.,

2010) and Monte Carlo Filtering (Rose et al., 1991) are used to quantify the uncertainty and important input factors controlling these projections. Global sensitivity analysis (GSA) apportions the total output uncertainty simultaneously onto all the uncertain input factors described by marginal probability density functions, and thus is preferred over local, one factor at a time, sensitivity analysis (Homma and Saltelli, 1996; Saltelli, 1999). Monte Carlo Filtering can identify sets of model simulations and input factors that meet a specified criteria or threshold. Thus global sensitivity analysis and Monte Carlo Filtering offer an opportunity to gain insight into the sources of uncertainty, and drivers of particular types of wet/dry behavior, when estimating future water deficit under projected climate change.

## 2. Methods

All retrospective and future climate variables were obtained from the CMIP5 archive (accessible for download at <http://pcmdi9.llnl.gov/>). The “historical” runs of CMIP5 were used for the retrospective period (1950-2005) and the same ensemble member runs (r1i1p1 ensemble) of CMIP5 were used for two future periods: future period 1 (2030-2060), and future period 2 (2070-2100). Data for three RCP trajectories, RCP2.6, RCP4.5 and RCP8.5 were included in the analyses. Taylor et al. (2012) described an overview of CMIP5 and RCP trajectories and compared the differences between CMIP5 and CMIP3 model projections.

Data from the CMIP5 archive were used to calculate monthly mean  $P$ ,  $ET_0$ , and  $P - ET_0$  (water deficit) for the retrospective and both future periods over each of the nine U.S. climate regions identified by the National Climatic Data Center (Karl and Koss, 1984 (Fig. 1)). Future changes in monthly mean  $P$ ,  $ET_0$ , and  $P - ET_0$  were estimated by subtracting the monthly mean value for the retrospective period from the monthly mean value for future period 1 or future period 2, as appropriate (Baker and Huang, 2014).

Ten commonly used reference evapotranspiration estimation methods (Hargreaves, Blaney-Criddle, Hamon, Kharrufa, Irmak-Rn, Irmak-Rs, Dalton, Meyer, Penman-Monteith and Priestley-Taylor) were used in this study. The methods can be further classified into temperature- (Hargreaves, Blaney-Criddle, Hamon and Kharrufa), radiation (Irmak-Rn, Irmak-Rs and Priestley-Taylor), mass transfer (Dalton and Meyer), and combination (Penman-Monteith)

equations. These equations are well-described in many papers (e.g., Allen et al., 1998; Hargreaves and Allen, 2003; Irmak et al., 2003; Tabari, 2010; Tabari et al., 2013; Xu and Singh, 2001) and are summarized in Table 1 (hereafter precipitation is referred to as P, and reference evapotranspiration is referred to as  $ET_0$  for convenience).

Variables directly used from the CMIP5 monthly model output included precipitation (pr, P in this study), maximum and minimum temperature (tasmax and tasmin), radiation (rlds, rlus, rsds, and rsus), air pressure (psl and ps), and wind speed (sfcWind). The abbreviations for these variables are as defined in the CMIP5 archive and explained in the PCMDI server (Program For Climate Model Diagnosis and Intercomparison, [http://cmip-pcmdi.llnl.gov/cmip5/docs/standard\\_output.pdf](http://cmip-pcmdi.llnl.gov/cmip5/docs/standard_output.pdf)). Other variables needed in the ten reference evapotranspiration equations were calculated using the variables from CMIP5 monthly model output (for details see Table 1). Monthly output that included all the variables needed for the Penman-Monteith reference evapotranspiration method (the most data intensive method) was available for both the retrospective period, and for the RCP2.6, RCP 4.5, and RCP8.5 trajectories for the future periods, for 9 CMIP5 models. Table 2 lists the 9 models from the CMIP5 archive that were used in this study.

The sensitivity of changes in future P,  $ET_0$  and water deficit (defined here as  $P - ET_0$ ) to the choice of GCM,  $ET_0$  estimation method, and RCP trajectory was evaluated using the variance-based GSA method of Saltelli et al. (2010). Given a model of the form  $Y = f(X_1, X_2, \dots, X_k)$ , with  $Y$  a scalar, the variance-based first order effect for a generic factor  $X_i$  can be written (Saltelli et al., 2010):

$$V_{X_i} \left( E_{X_{\sim i}}(Y|X_i) \right) \quad (1)$$

where  $X_i$  is the  $i$ -th factor (in our case either GCM,  $ET_0$  method or RCP trajectory) and  $X_{\sim i}$  is the vector of all factors except  $X_i$ . The expectation operator  $E_{X_{\sim i}}(Y|X_i)$  indicates that the mean of  $Y$  is taken over all possible values of  $X$  except  $X_i$  (i.e.  $X_{\sim i}$ ) while keeping  $X_i$  fixed. The variance,  $V_{X_i}$ , is then taken of this quantity over all possible values of  $X_i$ .

The first order sensitivity coefficient is expressed as:

$$S_i = \frac{V_{X_i}(E_{X \sim i}(Y|X))}{V(Y)} \quad (2)$$

Where  $V(Y)$  the total variance of  $Y$  over all  $X_i$ .  $S_i$  is a normalized index varying between 0 and 1, because  $V_{X_i}(E_{X \sim i}(Y|X_i))$  varies between 0 and  $V(Y)$  according to the identity (Mood et al., 1974):

$$V_{X_i}(E_{X \sim i}(Y|X_i)) + E_{X_i}(V_{X \sim i}(Y|X_i)) = V(Y) \quad (3)$$

As indicated above  $V_{X_i}(E_{X \sim i}(Y|X_i))$  is the first order effect of  $X_i$  on the model output  $Y$ , while  $E_{X_i}(V_{X \sim i}(Y|X_i))$  is called the residual. The total effect index, including first order and higher order effects (i.e. interactions between factor  $X_i$  and other factors) of the factor  $X_i$  on the model output is calculated (Saltelli et al., 2010):

$$S_{T_i} = \frac{E_{X \sim i}(V_{X_i}(Y|X_{\sim i}))}{V(Y)} = 1 - \frac{V_{X \sim i}(E_{X_i}(Y|X_{\sim i}))}{V(Y)} \quad (4)$$

The first order sensitivity of estimated future changes in mean monthly  $P$ ,  $ET_0$ , and  $P-ET_0$  to choice of GCM,  $ET_0$  estimation method and RCP trajectory were calculated over the 9 US climate regions for each future period in order to evaluate the relative contributions of each of these factors on the uncertainty of future changes. A total of 270 simulations (9 GCMs  $\times$  10 evapotranspiration methods  $\times$  3 RCP trajectories) was used in the analysis. Sensitivity of projected changes in  $P$  were evaluated for both choice of GCM and choice of RCP trajectory. Sensitivity of projected changes in  $ET_0$  and  $P-ET_0$  were evaluated for choice of GCM, choice of  $ET_0$  estimation method, and choice of RCP trajectory.

For projected changes in water deficit ( $P-ET_0$ ) Monte Carlo filtering (Saltelli et al., 2008) was used to identify whether projected wetter or drier future conditions (i.e. larger or smaller water deficit) could be attributed to specific GCMs,  $ET_0$  estimation methods, or RCP trajectories. For each future period the ensemble of 270 projections of change in water deficit were categorized as either wet future condition (mean change in  $(P - ET_0) \geq 0$ ) or dry future condition (mean change in  $(P - ET_0) < 0$ ). Next for each factor ( $X_i$  = GCM,  $ET_0$  method, RCP trajectory) the histograms of wet ( $f_{wet}|X_i$ ) and dry ( $f_{dry}|X_i$ ) future conditions over the range of

possible values of that factor were estimated. To identify the factors that are most responsible for driving the model into projected wet or dry future conditions for each factor,  $X_i$ , the distributions ( $f_{wet}|X_i$ ) and ( $f_{dry}|X_i$ ) were tested for significant difference using the  $X^2$  two sample test for categorical variables with  $\alpha=0.05$  (Rao and Scott, 1981). If for a given factor  $X_i$  the two distributions are significantly different, then  $X_i$  is a key factor in driving into either a wet or dry condition (Saltelli et al., 2008).

Because GCM predictions are known to contain systematic biases (Hwang and Graham, 2013; Wood et al., 2002, 2004) we evaluated the sensitivity of the mean monthly change in raw climate predictions between retrospective and future periods to the choice of GCM,  $ET_0$  estimation method and RCP trajectories. This is analogous to using the delta change GCM bias correction method that involves shifting the mean of a series of observed climate data by the mean difference in raw GCM output between the corresponding observed time period and the desired future period. Teutschbein and Seibert (2012) pointed out that all bias correction methods are based on the stationarity principle that assumes that similar biases occur in the retrospective and future predictions and thus the same bias-correction algorithm may be applied to both. Muerth et al. (2013) found that the impact of bias correction on the relative change of flow indicators between retrospective and future periods was weak for most indicators, however Pierce et al. (2015) found that some bias correction methods altered model-projected changes in mean precipitation and temperature. LaFond et al. (2014) found that the delta change GCM bias correction method was more useful for simulating hydrologic extreme events than the quantile mapping bias correction method as it preserved daily climate variability better. In this study, we differenced raw rather than bias corrected GCM outputs in order to prevent spurious alteration of the climate change signal between retrospective and future GCMs that might be induced by the bias correction method.

### 3. Results

Future P,  $ET_0$  and water deficit projections include large uncertainties stemming from different sources. Figures 2 and 3 present maps of the mean change (Fig. 2) and the standard deviation of change (Fig. 3) in annual P (top chart),  $ET_0$  (middle) and water deficit ( $P - ET_0$ ;

bottom) over the continental US calculated over all GCMs,  $ET_0$  estimation methods, and RCP trajectories for future period 2 (2070-2100). Major portions of the West, Southwest and South show a mean decrease in annual precipitation, while the rest of the continental US shows a mean increase (Fig. 2 (a)). Future annual  $ET_0$  shows a mean increase over retrospective annual  $ET_0$  over the entire US (Fig. 2 (b)), with the largest increase in the South region. Following the patterns of P and  $ET_0$ , future annual water deficit ( $P - ET_0$ ) shows a significant mean decrease in the West, Southwest and South regions and a slight decline, or negligible change in most other regions (Fig. 2 (c)). These mean changes in annual P,  $ET_0$  and  $P - ET_0$  are relatively small compared to the standard deviation of changes in annual P,  $ET_0$ , and  $P - ET_0$  (Fig. 3). Water deficit in particular has a large standard deviation, resulting in coefficients of variation larger than one throughout the continental US. Similar results are shown in the Fig. S-1 and Fig. S-2 for future period 1 (2030-2060) in the supplemental materials.

Figure 4 shows the seasonal changes in the monthly mean and standard deviation of water deficit ( $P - ET_0$ ) over the nine US regions. Blue and red lines represent the changes in monthly mean water deficit for future period 1 and future period 2, respectively and the error bars represent one standard deviation around each mean value. All regions of the continental US show drier conditions (negative mean changes) in the summer season (Jun – Aug). Southern regions (Southeast, South, Southwest and West) show drier conditions throughout the year, however northern portions of the US (i.e. the Northeast, Ohio Valley, Upper Midwest, Northern Rockies and Plains and Northwest) show wetter conditions (positive mean changes) in the winter season.

Figure 5 shows the first order sensitivity of change in P to GCM and RCP trajectory over the nine US climate regions for future periods 1 and 2. For projected changes in P, the choice of GCM is generally more important than choice of RCP trajectory for all regions and both future periods. First order sensitivities of mean change in  $ET_0$  to GCM,  $ET_0$  method and RCP trajectory are shown in Fig. 6. This figure clearly shows that the choice of  $ET_0$  method is the most influential factor for projecting change in  $ET_0$  for both future periods, except for the month of March in the Northeast, Upper Midwest and Northern Rockies and Plains. High sensitivity of mean change in  $ET_0$  to GCM selection occurs in spring for several regions (Northeast, Upper Midwest and Northern Rockies and Plains), indicating a divergence of model predictions during



this time. The influence of the RCP trajectory on  $ET_0$  increases in future period 2 over future period 1, with a concomitant decrease in the influence of both  $ET_0$  method and GCM. In future period 1 the GCM sensitivity coefficients are greater than the RCP trajectory sensitivity coefficients over most regions; however, in future period 2 the RCP sensitivity coefficients become more important. Figure 7 shows that projected change in water deficit depend strongly on both the choice of GCM and  $ET_0$  estimation method. In all regions except the Southeast projected change in water deficit is most sensitive to  $ET_0$  estimation method in the warm season (May through October) and most sensitive to GCM in the cool season (December through March). For the Southeast region the sensitivity coefficients for GCM and  $ET_0$  method are quite similar throughout the year. The sensitivity coefficients for RCP trajectory are very low in future 1, but increase in future 2, becoming approximately equal to the GCM sensitivity coefficients in the summer season in future 2.

Figure 8 shows the change in annual mean water deficit over all 9 GCMs for the RCP 4.5 trajectory in future period 1 (2030-2060) predicted by the ten different  $ET_0$  methods used in this study (a: Hargreaves, b: Blaney-Criddle, c: Hamon, d: Kharrufa, e: Irmak-Rn, f: Irmak-Rs, g: Dalton, h: Meyer, i: Penman-Monteith, j: Priestley-Taylor). This figure clearly shows that the changes in water deficit for future period 1 are diverse and depend strongly on the choice of  $ET_0$  method. Except for the Hargreaves method (Fig. 8a) the temperature based methods (e.g. Blaney-Criddle (Fig. 8b), Hamon (Fig. 8c) and Kharrufa (Fig. 8d)) predict drier conditions over the continental US than the other methods. The mass transfer based methods (e.g Dalton (Fig. 8g) and Meyer (Fig. 8h)) predict generally wetter conditions over most of the continental US compared to other methods. The combination method (Penman Monteith (Fig. 8i)), and the radiation based methods (Irmak-Rn (Fig 8e), Irmak-Rs (Fig. 8f) and Priestley Taylor (Fig. 8j)) generally fall between the mass transfer based and temperature based methods, with the combination methods producing slightly drier conditions. Although most methods predict similar spatial patterns of water deficit over the continental US (generally drier conditions in the West, Southwest and South and generally wetter elsewhere), the Hamon method predicts a different pattern of water deficit over the Southwest, South and Northern Rockies and Plains regions.

Monte Carlo filtering (Saltelli et al., 2008) was conducted to further investigate whether projected wetter or drier future conditions (i.e. larger or smaller annual mean water deficit) could

be attributed to specific GCMs,  $ET_0$  estimation methods, or RCP trajectories. Figures 9 shows the histograms for wet conditions and dry conditions in future 2 over the Southeast US by GCM,  $ET_0$  method and RCP trajectory for the example month of July. Figure 10 shows similar histograms for the Northern Rockies and Plains, a region with differing behavior from the Southeast US. Table 3 shows the P-value results for the  $X^2$ -test for all months in both futures for the Southeast and Northern Rockies and Plains regions. P-values greater than 0.05 (shaded in grey) indicate the two histograms are not significantly different from each other. Tables 4 – 6 show the fraction of time that a particular GCM (Table 4),  $ET_0$  method (Table 5), or RCP trajectory (Table 6) projected drier future conditions in each of the 9 US climate regions for each month, with fractions higher than 0.5 shaded in grey.

#### 4. Discussion

Drier conditions in southern regions (Southeast, South, Southwest and West) and wetter conditions in northern regions (Northeast, Ohio Valley, Upper Midwest, Northern Rockies and Plains and Northwest) are consistent (Fig. 4) with those reported by McAfee (2013) who used 3  $ET_0$  methods (Hamon, Priestley-Taylor and Penman-Monteith) to estimate global changes in  $ET_0$  over the entire globe. As found by Baker and Huang (2014) for both CMIP3 and CMIP5 projections, mean  $ET_0$  is projected to be higher in future period 2 than in future period 1, and mean precipitation projections are approximately equivalent in future period 1 and future period 2. Thus the projected mean changes in water deficit for future period 2 (red lines in Fig. 4) are larger in magnitude than the projected changes for future period 1 (blue lines). In all regions, and for both future periods, the one standard deviation error bars bracket zero mean change indicating large uncertainty in the projections throughout the year.

The choice of GCM is generally more important than the choice of RCP trajectory for projected changes in P (Fig. 5). This is consistent with results found by Gaetani and Mohino (2013) and Knutti and Sedláček (2012) who showed significant differences in precipitation predictions among CMIP5 models. It should be noted that these results do not indicate that the choice of RCP trajectory does not affect the change in precipitation, only that the choice of RCP trajectory is less influential than the choice of GCM. There are no consistent seasonal patterns of

the first-order sensitivity coefficients for either GCM or RCP trajectory in either future period. However, during the spring months, the sensitivity of change in P to choice of RCP trajectory increases substantially in future 2 compared to future 1 in the Northeast, Ohio Valley, Upper Midwest, South, Southwest and West regions.

Higher sensitivity of mean change in  $ET_0$  to the choice of  $ET_0$  estimation method than the choice of GCM (Fig. 6) are consistent with those found by Kingston et al. (2009) who showed that projected increase in  $ET_0$  varied by more than 100% between  $ET_0$  methods, and Schwalm et al. (2013) who found the choice of  $ET_0$  estimation method is sensitive and even more influential than the choice of GCM in predicting  $ET_0$ . However, neither of these studies looked at the influence of RCP trajectory on  $ET_0$  projections, which increases in future period 2 over future period 1, causing a decrease in the sensitivity coefficient of both GCM and  $ET_0$  method in future 2. Burke and Brown (2008) evaluated uncertainties in the projection of future drought using several drought indices. They found that there are large uncertainties in regional changes in drought and changes in drought are dependent on both index definition and GCM ensemble members. Similarly, our results for the projected change in water deficit vary by region, depend strongly on the choice of GCM and  $ET_0$  estimation method, but are relatively less sensitive to RCP trajectory (Fig. 7). These findings are similar to results reported by Orłowsky and Seneviratne (2013) who found that the greenhouse gas emission scenario uncertainty is not as important as differences among GCMs or internal climate variability when predicting Standardized Precipitation Index (SPI) and soil moisture (SMA). However, they also found that uncertainty due to greenhouse gas emission scenario increased in later future periods. Taylor et al. (2013) showed the patterns of changes in future drought were similar between the A1B scenario in CMIP3 and the RCP2.6 trajectory in CMIP5, reinforcing our finding that the choice of RCP trajectory is less important than the choice of GCM and  $ET_0$  estimation method when estimating future water deficit.

Similar to the results of Kay and Davies (2008) and Bae et al. (2011) the results of our GSA show that the choice of  $ET_0$  method has important implications when making future  $ET_0$  projections and future water deficit projections (Fig. 8). Kingston et al. (2009) recommended the use of different  $ET_0$  equations to evaluate global  $ET_0$ , and Wang et al. (2015) found that although different methods predict similar future  $ET_0$ , there are important differences in uncertainties due

to ET<sub>0</sub> estimation methods and input data reliability. Currently many hydrological models use a single evapotranspiration method for simulation, which may substantially increase the uncertainty and reduce the reliability of future projections. Our results strongly indicate that an ensemble of ET<sub>0</sub> estimation methods should be used to understand potential future water availability and water deficit due to climate change.

Monte Carlo filtering results (Fig. 9 and 10, Table 3) indicate that GCM and ET<sub>0</sub> methods both produce statistically significant different wet condition and dry condition histograms in both the Southeast and Northern Rockies and Plains regions for almost all months in both future periods. This indicates that particular GCMs and ET<sub>0</sub> methods tend to systematically produce wet or dry conditions. Some GCMs (i.e. MIROC\_ESM and BCC-CSM (Table 4)) and ET<sub>0</sub> methods (i.e. Priestley-Taylor, Blaney-Criddle, and Kharrufa (Table 5)) predict dry conditions a majority of the time for all regions in both future periods. However the remaining GCMs and ET<sub>0</sub> methods project both wetter or drier futures depending on the region and future period. Results in Tables 4 through 6 show that for the South, West and Southwest regions drier conditions are predicted a majority of the time in both future periods by all GCMs and RCP trajectories, and all ET<sub>0</sub> methods except Hargreaves. For RCP trajectory, P-values indicate the histograms are statistically significantly different in fewer cases than for either GCM or ET<sub>0</sub> method for both future 1 and 2 (Table 3). These results are consistent with the first order sensitivity coefficients results that showed the RCP trajectory is not as important a factor as GCM or ET<sub>0</sub> method in driving differences in future projections, but that the sensitivity to choice of RCP trajectory increases in future period 2.

GCMs estimate some climate variables, such as temperature, with higher confidence than other variables (Randall et al., 2007). However, for some evapotranspiration estimation methods the effect of temperature on evaporation is smaller than other climate variables (Linacre, 1994; Roderick et al., 2009a, 2009b; Thom et al., 1981). We found that temperature and net radiation from the CMIP5 GCMs show increasing trends over the 2005-2100 time period, while wind speed and surface pressure are relatively constant (Fig. S-3). Because we considered various ET<sub>0</sub> estimation methods our results include the impacts of the different physics represented in the ET<sub>0</sub> methods, the projected changes each of the climate variables contributing to the different ET<sub>0</sub> methods, and the reliability of the predictions of each variable.

344

## 345 **5. Conclusions**

346         Future changes in precipitation and evapotranspiration will lead to changes in the  
347 hydrologic balance. This study clearly shows that the uncertainty caused by different GCMs,  $ET_0$   
348 methods, and RCP trajectories make actionable water resources planning based on climate  
349 change projections difficult. Understanding and quantifying how these projected changes vary  
350 with choice of GCM,  $ET_0$  method and RCP trajectory is important for designing robust  
351 ensembles of scenarios to include in future water resources planning. This study assessed the  
352 future mean change in monthly precipitation, evapotranspiration and water deficit ( $P - ET_0$ )  
353 projected by CMIP5 simulations over the continental US and analyzed the sensitivity of the  
354 projected changes to the choice of GCM,  $ET_0$  estimation method, and RCP trajectory. Nine  
355 GCMs, ten  $ET_0$  estimation methods, and three RCP trajectories were included in the analyses.  
356 Variance-based global sensitivity analysis (Saltelli et al., 2010) was conducted in order to  
357 determine the relative contributions of the choice of GCMs,  $ET_0$  estimation methods, and RCP  
358 trajectory to uncertainty in future prediction. Monte Carlo filtering was used to investigate  
359 whether particular GCMs,  $ET_0$  methods, and/or RCP scenarios consistently led to wet or dry  
360 future projections.

361         The CMIP5 results, when averaged over nine GCMs, ten  $ET_0$  methods, and three RCP  
362 trajectories, indicate that the West, Southwest, and South US are projected to experience a  
363 decrease in annual precipitation, while all other regions of the continental US are projected  
364 experience an increase in annual mean precipitation for both future periods 1 and 2. An increase  
365 in annual mean  $ET_0$  is predicted over the entire continental US for both future periods, with the  
366 largest increases in West, South and Southeast. Future water deficit is projected to significantly  
367 decrease in the West, Southwest, and South regions of the continental US. A slight decline or  
368 negligible change is projected in most other regions. The standard deviations of projected  
369 changes in  $P$ ,  $ET_0$  and water deficit are large compared to the mean changes, making actionable  
370 water resources planning based on these climate change projections difficult.

371         The global sensitivity analyses showed that projected changes in precipitation are more  
372 sensitive to the choice of GCM than the choice of RCP trajectory over the entire continental US

for both future periods. However, the choice of RCP trajectory becomes more important in future period 2. The most sensitive factor for the future  $ET_0$  projections is the choice of  $ET_0$  estimation method for all regions in both future periods. The first order sensitivity of projected change in future  $ET_0$  to choice of RCP trajectory increases in future period 2 compared to future 1, with a concomitant decrease in the first order sensitivity to the choice of GCM. For projected change in future water deficit the choice of  $ET_0$  method constitutes the dominant source of uncertainty in warmer months (May through September) and the choice of GCM is the dominant source of uncertainty in the cooler months (November through March) over all regions except the Southeast where the sensitivity of GCM and  $ET_0$  method are roughly equal throughout the year. Sensitivity of change in future water deficit to RCP trajectory is very small for future period 1, but increased in future period 2.

Monte Carlo filtering results indicated that both GCMs and  $ET_0$  methods produced statistically different histograms for wetter or drier future conditions (i.e. larger or smaller mean future water deficit) for almost all months in both future periods. Two GCMs (MIROC\_ESM and BCC-CSM) and three  $ET_0$  methods (Priestley-Taylor, Blaney-Criddle, and Kharrufa) predicted dry conditions a majority of the time for all regions in both future periods; however, the remaining GCMs and  $ET_0$  methods projected both wetter and drier futures depending on the region.

Results of this study indicate that when predicting the effects of future climate on water resources the choice of evapotranspiration method should be carefully evaluated. Rather than the typical practice of using a single  $ET_0$  method to drive a hydrologic model with future climate projections, an ensemble of  $ET_0$  methods should be used in addition to an ensemble of GCMs and a variety of RCP trajectories. The GSA methodology adopted here assumed that all the GCMs,  $ET_0$  methods and RCP trajectories used in this study were equally appropriate for use in all US regions (i.e the sensitivity coefficients were evaluated by equally weighting each GCMs,  $ET_0$  method and RCP trajectory) which is likely not to be the case. When making future projections potential climate change on water resources Reliability Ensemble Averaging (REA) (Giorgi and Mearns, 2002) or Bayesian-based indicator-weighting (Asefa and Adams, 2013; Tebaldi et al., 2005) could be used to weight the results of an ensemble of GCMs and  $ET_0$  methods based on how close the retrospective GCM-  $ET_0$  method predictions agree with past

observations (bias criterion) and how well the future GCM-  $ET_0$  -RCP projections agree with other future GCM-  $ET_0$  -RCP predictions (convergence criterion).

This study assumed that  $ET_0$  methods that have been developed and parameterized based on vegetation response to current  $CO_2$  levels and climatic conditions will be valid under future  $CO_2$  levels and climatic conditions. Future research should explore the validity of this assumption by incorporating potential changes in plant transpiration (e.g. stomatal conductance) to changing  $CO_2$  levels into the  $ET_0$  estimation methodologies.

## **Acknowledgements**

This research was supported by Tampa Bay Water and the University of Florida Water Institute. We acknowledge the modeling groups participating in the Program for Climate Model Diagnosis and Inter-comparison (PCMDI) for their role in making the CMIP5 (Coupled Model Intercomparison Project) multi-model data set available.

## References

- Allen, R. G., Pereira, L. S., Raes, D. and Smith, M.: Crop evapotranspiration: guidelines for computing crop water requirements. FAO Irrigation and Drainage Paper 56., 1998.
- Asefa, T. and Adams, A.: Reducing bias-corrected precipitation projection uncertainties: A Bayesian-based indicator-weighting approach, *Reg. Environ. Chang.*, 13, 111–120, doi:10.1007/s10113-013-0431-9, 2013.
- Baker, N. C. and Huang, H.-P.: A Comparative Study of Precipitation and Evaporation between CMIP3 and CMIP5 Climate Model Ensembles in Semiarid Regions, *J. Clim.*, 27(10), 3731–3749, doi:10.1175/JCLI-D-13-00398.1, 2014.
- Bentsen, M., Bethke, I., Debernard, J. B., Iversen, T., Kirkevåg, a., Seland, Ø., Drange, H., Roelandt, C., Seierstad, I. a., Hoose, C. and Kristjánsson, J. E.: The Norwegian Earth System Model, NorESM1-M – Part 1: Description and basic evaluation of the physical climate, *Geosci. Model Dev.*, 6(3), 687–720, doi:10.5194/gmd-6-687-2013, 2013.
- Block, K. and Mauritsen, T.: Forcing and feedback in the MPI-ESM-LR coupled model under abruptly quadrupled CO<sub>2</sub>, *J. Adv. Model. Earth Syst.*, 5(4), 676–691, doi:10.1002/jame.20041, 2013.
- Burke, E. J. and Brown, S. J.: Evaluating Uncertainties in the Projection of Future Drought, *J. Hydrometeorol.*, 9(2), 292–299, doi:10.1175/2007JHM929.1, 2008.
- Chaouche, K., Neppel, L., Dieulin, C., Pujol, N., Ladouche, B., Martin, E., Salas, D. and Caballero, Y.: Analyses of precipitation, temperature and evapotranspiration in a French Mediterranean region in the context of climate change, *Comptes Rendus Geosci.*, 342(3), 234–243, doi:10.1016/j.crte.2010.02.001, 2010.
- Chong-Hai, X. and Ying, X.: The projection of temperature and precipitation over China under RCP scenarios using a CMIP5 multi-model ensemble, *Atmos. Ocean. Sci. Lett.*, 5(6), 527–533, doi:10.1080/16742834.2012.11447042, 2012.
- Gaetani, M. and Mohino, E.: Decadal prediction of the sahelian precipitation in CMIP5 simulations, *J. Clim.*, 26(19), 7708–7719, doi:10.1175/JCLI-D-12-00635.1, 2013.
- Georgakakos, A., Fleming, P., Dettinger, M., Peters-Lidard, C., Richmond, T., Reckhow, K., White, K. and Yates, D.: Ch. 3: Water Resources. *Climate Change Impacts in the United States: The Third National Climate Assessment.*, 2014.
- Giorgi, F. and Mearns, L.: Calculation of average, uncertainty range, and reliability of regional climate changes from AOGCM simulations via the “reliability ensemble averaging”(REA) method, *J. Clim.*, 15(10), 1141–1158, doi:http://dx.doi.org/10.1175/1520-0442(2002)015<1141:COAURA>2.0.CO;2, 2002.
- Guo, H., Golaz, J.-C., Donner, L. J., Ginoux, P. and Hemler, R. S.: Multivariate Probability Density Functions with Dynamics in the GFDL Atmospheric General Circulation Model: Global Tests, *J. Clim.*, 27(5), 2087–2108, doi:10.1175/JCLI-D-13-00347.1, 2014.
- Hargreaves, G. H. and Allen, R. G.: History and Evaluation of Hargreaves Evapotranspiration Equation, *J. Irrig. Drain. Eng.*, 129(1), 53–63, doi:10.1061/(ASCE)0733-9437(2003)129:1(53), 2003.
- Hawkins, E. and Sutton, R.: The potential to narrow uncertainty in regional climate predictions,



458 Bull. Am. Meteorol. Soc., 90(8), 1095–1107, doi:10.1175/2009BAMS2607.1, 2009.

459 Hawkins, E. and Sutton, R.: The potential to narrow uncertainty in projections of regional  
 460 precipitation change, *Clim. Dyn.*, 37(1-2), 407–418, doi:10.1007/s00382-010-0810-6, 2010.

461 Homma, T. and Saltelli, A.: Importance measures in global sensitivity analysis of nonlinear  
 462 models, *Reliab. Eng. Syst. Saf.*, 52(1), 1–17, doi:10.1016/0951-8320(96)00002-6, 1996.

463 Hwang, S. and Graham, W. D.: Development and comparative evaluation of a stochastic analog  
 464 method to downscale daily GCM precipitation, *Hydrol. Earth Syst. Sci.*, 17(11), 4481–4502,  
 465 doi:10.5194/hess-17-4481-2013, 2013.

466 Irmak, S., Irmak, A., Allen, R. G. and Jones, J. W.: Solar and Net Radiation-Based Equations to  
 467 Estimate Reference Evapotranspiration in Humid Climates, *J. Irrig. Drain. Eng.*, 129(5), 336–  
 468 347, doi:10.1061/(ASCE)0733-9437(2003)129:5(336), 2003.

469 Ishak, A. M., Bray, M., Remesan, R. and Han, D.: Estimating reference evapotranspiration using  
 470 numerical weather modelling, *Hydrol. Process.*, 24(24), 3490–3509, doi:10.1002/hyp.7770,  
 471 2010.

472 Ji, D., Wang, L., Feng, J., Wu, Q., Cheng, H., Zhang, Q., Yang, J., Dong, W., Dai, Y., Gong, D.,  
 473 Zhang, R.-H., Wang, X., Liu, J., Moore, J. C., Chen, D. and Zhou, M.: Description and basic  
 474 evaluation of BNU-ESM version 1, *Geosci. Model Dev. Discuss.*, 7(2), 1601–1647,  
 475 doi:10.5194/gmdd-7-1601-2014, 2014.

476 Johnson, F. and Sharma, A.: Measurement of GCM Skill in Predicting Variables Relevant for  
 477 Hydroclimatological Assessments, *J. Clim.*, 22(16), 4373–4382, doi:10.1175/2009JCLI2681.1,  
 478 2009.

479 Karl, T. R. and Koss, W. J.: Historical Climatology Series 4-3: Regional and National Monthly,  
 480 Seasonal, and Annual Temperature Weighted by Area, 1895-1983., 1984.

481 Kharin, V. V., Zwiers, F. W., Zhang, X. and Wehner, M.: Changes in temperature and  
 482 precipitation extremes in the CMIP5 ensemble, *Clim. Change*, 119(2), 345–357,  
 483 doi:10.1007/s10584-013-0705-8, 2013.

484 Kingston, D. G., Todd, M. C., Taylor, R. G., Thompson, J. R. and Arnell, N. W.: Uncertainty in  
 485 the estimation of potential evapotranspiration under climate change, *Geophys. Res. Lett.*, 36(20),  
 486 L20403, doi:10.1029/2009GL040267, 2009.

487 Knutti, R. and Sedláček, J.: Robustness and uncertainties in the new CMIP5 climate model  
 488 projections, *Nat. Clim. Chang.*, 3(4), 369–373, doi:10.1038/nclimate1716, 2012.

489 LaFond, K. M., Griffis, V. W. and Spellman, P.: Forcing Hydrologic Models with GCM Output:  
 490 Bias Correction vs. the “Delta Change” Method, in *World Environmental and Water Resources*  
 491 *Congress 2014*, vol. 1, pp. 2146–2155, American Society of Civil Engineers, Reston, VA., 2014.

492 Linacre, E. T.: Estimating U.S. Class A Pan Evaporation from Few Climate Data, *Water Int.*,  
 493 19(1), 5–14, doi:10.1080/02508069408686189, 1994.

494 Maurer, E. P. and Hidalgo, H. G.: Utility of daily vs. monthly large-scale climate data: an  
 495 intercomparison of two statistical downscaling methods, *Hydrol. Earth Syst. Sci.*, 12(2), 551–  
 496 563, doi:10.5194/hess-12-551-2008, 2008.

497 McAfee, S. A.: Methodological differences in projected potential evapotranspiration, *Clim.*  
 498 *Change*, 120(4), 915–930, doi:10.1007/s10584-013-0864-7, 2013.

499 Mood, A. M., Graybill, F. A. and Boes, D. C.: Introduction to theory of statistics, McGraw-Hill,  
500 Inc., 1974.

501 Orłowsky, B. and Seneviratne, S. I.: Elusive drought: uncertainty in observed trends and short-  
502 and long-term CMIP5 projections, *Hydrol. Earth Syst. Sci.*, 17(5), 1765–1781, doi:10.5194/hess-  
503 17-1765-2013, 2013.

504 Quintana Seguí, P., Ribes, A., Martin, E., Habets, F. and Boé, J.: Comparison of three  
505 downscaling methods in simulating the impact of climate change on the hydrology of  
506 Mediterranean basins, *J. Hydrol.*, 383(1-2), 111–124, doi:10.1016/j.jhydrol.2009.09.050, 2010.

507 Randall, D. A., Wood, R. A., Bony, S., Colman, R., Fichet, T., Fyfe, J., Kattsov, V., Pitman,  
508 A., Shukla, J., Srinivasan, J., Stouffer, R. J., Sumi, A. and Taylor, K. E.: Climate Models and  
509 Their Evaluation, in *Climate Change 2007: The Physical Science Basis. Contribution of Working*  
510 *Group I to the Fourth Assessment Report of the Intergovernmental Panel on Climate Change*,  
511 edited by S. Solomon, D. Qin, M. Manning, Z. Chen, M. Marquis, K. B. Averyt, M. Tignor, and  
512 H. L. Miller, pp. 591–662, Cambridge University Press, Cambridge, United Kingdom and New  
513 York, NY, USA., 2007.

514 Rao, J. N. K. and Scott, A. J.: The Analysis of Categorical Data From Complex Sample Survey :  
515 Chi-Squared Tests for Goodness of Fit and Independence in Two-Way Tables, *J. Am. Stat.*  
516 *Assoc.*, 76(374), 221–230, 1981.

517 Roderick, M. L., Hobbins, M. T. and Farquhar, G. D.: Pan Evaporation Trends and the  
518 Terrestrial Water Balance. I. Principles and Observations, *Geogr. Compass*, 3(2), 746–760,  
519 doi:10.1111/j.1749-8198.2008.00213.x, 2009a.

520 Roderick, M. L., Hobbins, M. T. and Farquhar, G. D.: Pan Evaporation Trends and the  
521 Terrestrial Water Balance. II. Energy Balance and Interpretation, *Geogr. Compass*, 3(2), 761–  
522 780, doi:10.1111/j.1749-8198.2008.00214.x, 2009b.

523 Rose, K. A., Smith, E. P., Gardner, R. H., Brenkert, A. L. and Bartell, S. M.: Parameter  
524 sensitivities, monte carlo filtering, and model forecasting under uncertainty, *J. Forecast.*,  
525 10(October 1989), 117–133, doi:10.1002/for.3980100108, 1991.

526 Rotstayn, L. D., Jeffrey, S. J., Collier, M. A., Dravitzki, S. M., Hirst, A. C., Syktus, J. I. and  
527 Wong, K. K.: Aerosol- and greenhouse gas-induced changes in summer rainfall and circulation  
528 in the Australasian region: a study using single-forcing climate simulations, *Atmos. Chem.*  
529 *Phys.*, 12(14), 6377–6404, doi:10.5194/acp-12-6377-2012, 2012.

530 Saltelli, A.: Sensitivity analysis: Could better methods be used?, *J. Geophys. Res.*, 104(D3),  
531 3789, doi:10.1029/1998JD100042, 1999.

532 Saltelli, A., Annoni, P., Azzini, I., Campolongo, F., Ratto, M. and Tarantola, S.: Variance based  
533 sensitivity analysis of model output. Design and estimator for the total sensitivity index, *Comput.*  
534 *Phys. Commun.*, 181(2), 259–270, doi:10.1016/j.cpc.2009.09.018, 2010.

535 Saltelli, A., Ratto, M., Andres, T., Campolongo, F., Cariboni, J., Gatelli, D., Saisana, M. and  
536 Tarantola, S.: *Global sensitivity analysis: the primer*, John Wiley & Sons, Inc., 2008.

537 Schwalm, C. R., Huntzger, D. N., Michalak, A. M., Fisher, J. B., Kimball, J. S., Mueller, B.,  
538 Zhang, K. and Zhang, Y.: Sensitivity of inferred climate model skill to evaluation decisions: a  
539 case study using CMIP5 evapotranspiration, *Environ. Res. Lett.*, 8(2), 024028,  
540 doi:10.1088/1748-9326/8/2/024028, 2013.

541 Sung, J. H., Kang, H.-S., Park, S., Cho, C., Bae, D. H. and Kim, Y.-O.: Projection of Extreme  
542 Precipitation at the end of 21st Century over South Korea based on Representative Concentration  
543 Pathways (RCP), *Atmosphere (Basel)*, 22(2), 221–231, doi:10.14191/Atmos.2012.22.2.221,  
544 2012.

545 Tabari, H.: Evaluation of Reference Crop Evapotranspiration Equations in Various Climates,  
546 *Water Resour. Manag.*, 24(10), 2311–2337, doi:10.1007/s11269-009-9553-8, 2010.

547 Tabari, H., Grismer, M. E. and Trajkovic, S.: Comparative analysis of 31 reference  
548 evapotranspiration methods under humid conditions, *Irrig. Sci.*, 31(2), 107–117,  
549 doi:10.1007/s00271-011-0295-z, 2013.

550 Taylor, I. H., Burke, E., McColl, L., Falloon, P. D., Harris, G. R. and McNeall, D.: The impact of  
551 climate mitigation on projections of future drought, *Hydrol. Earth Syst. Sci.*, 17(6), 2339–2358,  
552 doi:10.5194/hess-17-2339-2013, 2013.

553 Taylor, K. E., Stouffer, R. J. and Meehl, G. A.: An Overview of CMIP5 and the Experiment  
554 Design, *Bull. Am. Meteorol. Soc.*, 93(4), 485–498, doi:10.1175/BAMS-D-11-00094.1, 2012.

555 Tebaldi, C., Smith, R. L., Nychka, D. and Mearns, L. O.: Quantifying Uncertainty in Projections  
556 of Regional Climate Change: A Bayesian Approach to the Analysis of Multimodel Ensembles, *J.*  
557 *Clim.*, 18(10), 1524–1540, doi:10.1175/JCLI3363.1, 2005.

558 Teutschbein, C. and Seibert, J.: Bias correction of regional climate model simulations for  
559 hydrological climate-change impact studies: Review and evaluation of different methods, *J.*  
560 *Hydrol.*, 456–457, 12–29, doi:10.1016/j.jhydrol.2012.05.052, 2012.

561 Thom, A. S., Thony, J.-L. and Vauclin, M.: On the proper employment of evaporation pans and  
562 atmometers in estimating potential transpiration, *Q. J. R. Meteorol. Soc.*, 107(453), 711–736  
563 [online] Available from: <http://dx.doi.org/10.1002/qj.49710745316>, 1981.

564 Thomas, A.: Spatial and temporal characteristics of potential evapotranspiration trends over  
565 China, *Int. J. Climatol.*, 20(4), 381–396, doi:10.1002/(SICI)1097-  
566 0088(20000330)20:4<381::AID-JOC477>3.0.CO;2-K, 2000.

567 Walsh, J., Wuebbles, D., Hayhoe, K., Kossin, J., Stephens, G., Thorne, P., Vose, R., Wehner, M.,  
568 Willis, J., Anderson, D., Doney, S., Feely, R., Hennon, P., Kharin, V., Knutson, T., Landerer, F.,  
569 Lenton, T., Kennedy, J. and Somerville, R.: Ch. 2: Our Changing Climate. *Climate Change*  
570 *Impacts in the United States: The Third National Climate Assessment.*, 2014.

571 Wang, W., Xing, W. and Shao, Q.: How large are uncertainties in future projection of reference  
572 evapotranspiration through different approaches?, *J. Hydrol.*, 524, 696–700,  
573 doi:10.1016/j.jhydrol.2015.03.033, 2015.

574 Wang, W., Xing, W., Shao, Q., Yu, Z., Peng, S., Yang, T., Yong, B., Taylor, J. and Singh, V. P.:  
575 Changes in reference evapotranspiration across the Tibetan Plateau: Observations and future  
576 projections based on statistical downscaling, *J. Geophys. Res. Atmos.*, 118(10), 4049–4068,  
577 doi:10.1002/jgrd.50393, 2013.

578 Watanabe, S., Hajima, T., Sudo, K., Nagashima, T., Takemura, T., Okajima, H., Nozawa, T.,  
579 Kawase, H., Abe, M., Yokohata, T., Ise, T., Sato, H., Kato, E., Takata, K., Emori, S. and  
580 Kawamiya, M.: MIROC-ESM: model description and basic results of CMIP5-20c3m  
581 experiments, *Geosci. Model Dev. Discuss.*, 4(2), 1063–1128, doi:10.5194/gmdd-4-1063-2011,  
582 2011.

- Wood, A. W., Leung, L. R., Sridhar, V. and Lettenmaier, D. P.: Hydrologic implications of dynamical and statistical approaches to downscaling climate model outputs, *Clim. Change*, 62(1-3), 189–216, doi:10.1023/B:CLIM.0000013685.99609.9e, 2004.
- Wood, A. W., Maurer, E. P., Kumar, A. and Lettenmaier, D. P.: Long-range experimental hydrologic forecasting for the eastern United States, *J. Geophys. Res.*, 107(D20), 4429, doi:10.1029/2001JD000659, 2002.
- Xiao-Ge, X., Tong-Wen, W., Jiang-Long, L., Zai-Zhi, W., Wei-Ping, L. and Fang-Hua, W.: How well does BCC\_CSM1. 1 reproduce the 20th century climate change over China?, *Atmos. Ocean. Sci. Lett.*, 6(1), 21–26 [online] Available from: <http://159.226.119.58/aosl/CN/article/downloadArticleFile.do?attachType=PDF&id=332> (Accessed 12 January 2015), 2013.
- Xu, C., Gong, L., Jiang, T., Chen, D. and Singh, V. P.: Analysis of spatial distribution and temporal trend of reference evapotranspiration and pan evaporation in Changjiang (Yangtze River) catchment, *J. Hydrol.*, 327(1-2), 81–93, doi:10.1016/j.jhydrol.2005.11.029, 2006.
- Xu, C. and Singh, V.: Cross comparison of empirical equations for calculating potential evapotranspiration with data from Switzerland, *Water Resour. Manag.*, 16(3), 197–219, doi:10.1023/A:1020282515975, 2002.
- Xu, C. and Singh, V. P.: Evaluation and generalization of temperature-based methods for calculating evaporation, *Hydrol. Process.*, 15(2), 305–319, doi:10.1002/hyp.119, 2001.
- Yukimoto, S., Adachi, Y., Hosaka, M., Sakami, T., Yoshimura, H., Hirabara, M., Tanaka, T. Y., Shindo, E., Tsujino, H., Deushi, M., Mizuta, R., Yabu, S., Obata, A., Nakano, H., Koshiro, T., Ose, T. and Kitoh, A.: A New Global Climate Model of the Meteorological Research Institute: MRI-CGCM3 -Model Description and Basic Performance-, *J. Meteorol. Soc. Japan*, 90A, 23–64, doi:10.2151/jmsj.2012-A02, 2012.
- Zhao, L., Xia, J., Xu, C., Wang, Z., Sobkowiak, L. and Long, C.: Evapotranspiration estimation methods in hydrological models, *J. Geogr. Sci.*, 23(2), 359–369, doi:10.1007/s11442-013-1015-9, 2013.

612 Table 1. Description of reference evapotranspiration estimation methods used in this study (ET<sub>0</sub>:  
613 Reference evapotranspiration).

| Methods              | Equations <sup>1</sup>                                                                                          | Reference                   |
|----------------------|-----------------------------------------------------------------------------------------------------------------|-----------------------------|
| (a) Hargreaves       | $ET_0 = 0.0135K_T S_0(T + 17.8)\sqrt{\delta_T}$                                                                 | Hargreaves and Allen (2003) |
| (b) Blaney-Criddle   | $ET_0 = p(0.46T + 8.13)$                                                                                        | Xu and Singh (2002)         |
| (c) Hamon            | $ET_0 = 0.55\delta_T^2 P_t$                                                                                     | Xu and Singh (2002)         |
| (d) Kharrufa         | $ET_0 = 0.34pT^{1.3}$                                                                                           | Xu and Singh (2002)         |
| (e) Irmak-Rn         | $ET_0 = 0.486 + 0.289R_n + 0.023T$                                                                              | Irmak et al. (2003)         |
| (f) Irmak-Rs         | $ET_0 = -0.611 + 0.149R_s + 0.079T$                                                                             | Irmak et al. (2003)         |
| (g) Dalton           | $ET_0 = (0.3648 + 0.07223u)(e_s - e_a)$                                                                         | Tabari et al. (2013)        |
| (h) Meyer            | $ET_0 = (0.375 + 0.05026u)(e_s - e_a)$                                                                          | Tabari et al. (2013)        |
| (i) Penman-Monteith  | $ET_0 = \frac{0.408\Delta(R_n - G) + \gamma \frac{900}{T + 273} u_2 (e_s - e_a)}{\Delta + \gamma(1 + 0.34u_2)}$ | Allen et al. (1998)         |
| (j) Priestley-Taylor | $ET_0 = \alpha \frac{\Delta}{\Delta + \gamma} \frac{(R_n - G)}{\lambda}$                                        | Allen et al. (1998)         |

614 <sup>1</sup>Variables (estimated from CMIP5 outputs): G: Soil heat flux (assumed 0);  $\gamma$ : Psychrometric constant; T: Average  
615 temperature;  $u_2$ : Wind speed at 2m surface;  $e_s$ : Saturated vapor pressure;  $e_a$ : Actual vapor pressure;  $\Delta$ : Slope vapor  
616 pressure;  $K_T$ : Hargreaves-Samani coefficient;  $S_0$ : Extraterrestrial radiation (estimated by Julian date);  $\delta_T$ : Difference  
617 between maximum and minimum temperature, p: Percentage of total daytime hours (Estimated by Julian date);  $R_n$ :  
618 Net radiation;  $R_s$ : Solar radiation;  $P_t$ : Saturated water vapor density; u: Wind speed

619 Table 2. Description of the CMIP5 models used in this study.

| Model                 | Institute (country)                                                                                                                                                 | Resolutions              | Calendar  | Reference                     |
|-----------------------|---------------------------------------------------------------------------------------------------------------------------------------------------------------------|--------------------------|-----------|-------------------------------|
| (1) BNU-ESM           | College of Global Change and Earth<br>System Science, Beijing Normal<br>University (China)                                                                          | 2.8° lat ×<br>2.8° lon   | No leap   | Ji et al. (2014)              |
| (2) CSIRO-MK3-6-<br>0 | University of New South Wales<br>(Australia)                                                                                                                        | 1.87° lat ×<br>1.87° lon | No leap   | Rotstayn et al.<br>(2012)     |
| (3) GFDL-CM3          | NOAA/Geophysical Fluid Dynamics<br>Laboratory (USA)                                                                                                                 | 2.0° lat ×<br>2.5° lon   | No leap   | Guo et al. (2014)             |
| (4) GFDL-ESM2G        | NOAA/Geophysical Fluid Dynamics<br>Laboratory (USA)                                                                                                                 | 2.0° lat ×<br>2.5° lon   | No leap   | Taylor et al. (2012)          |
| (5) MIROC-ESM         | Atmosphere and Ocean Research<br>Institute, National Institute for<br>Environmental Studies, and Japan<br>Agency for Marine-Earth Science and<br>Technology (Japan) | 2.8° lat ×<br>2.8° lon   | Leap year | Watanabe et al.<br>(2011)     |
| (6) MPI-ESM-LR        | Max Planck Institute for Meteorology<br>(Germany)                                                                                                                   | 1.87° lat ×<br>1.87° lon | Leap year | Block and<br>Mauritsen (2013) |
| (7) MRI-CGCM3         | Meteorological Research Institute<br>(Japan)                                                                                                                        | 1.12° lat ×<br>1.12° lon | Leap year | Yukimoto et al.<br>(2012)     |
| (8) NorESM1-M         | Norwegian Climate Centre (Norway)                                                                                                                                   | 1.9° lat ×<br>2.5° lon   | No leap   | Bentsen et al. (2013)         |
| (9) BCC-CSM1.1        | Beijing Climate Center (China)                                                                                                                                      | 2.8° lat ×<br>2.8° lon   | No leap   | Xiao-Ge et al.<br>(2013)      |

620

621 Table 3. P-values of Chi-square two sample test for difference among wet condition versus dry  
622 condition pdfs Southeast U.S (SE US) and Northern Rockies and Plains (NRP; West North  
623 Central) U.S. (Shaded cells indicate pdfs are not statistically significantly different at  $p=0.05$ )

| Month    |    | Future 1 |                 |        | Future 2 |                 |        |
|----------|----|----------|-----------------|--------|----------|-----------------|--------|
|          |    | GCM      | ET <sub>0</sub> | RCP    | GCM      | ET <sub>0</sub> | RCP    |
| SE<br>US | 1  | 0.0000   | 0.0689          | 0.3701 | 0.0000   | 0.1823          | 0.1853 |
|          | 2  | 0.0000   | 0.0889          | 0.4434 | 0.0000   | 0.0269          | 0.0000 |
|          | 3  | 0.0000   | 0.0365          | 0.0306 | 0.0000   | 0.0000          | 0.1339 |
|          | 4  | 0.0000   | 0.0000          | 0.6602 | 0.0000   | 0.0000          | 0.0001 |
|          | 5  | 0.0000   | 0.0000          | 0.3223 | 0.0000   | 0.0000          | 0.0041 |
|          | 6  | 0.0000   | 0.0000          | 0.0809 | 0.0000   | 0.0000          | 0.0006 |
|          | 7  | 0.0000   | 0.0000          | 0.2855 | 0.0000   | 0.0000          | 0.0749 |
|          | 8  | 0.0000   | 0.0000          | 0.2805 | 0.0000   | 0.0000          | 0.0074 |
|          | 9  | 0.0000   | 0.0000          | 0.8646 | 0.0000   | 0.0000          | 0.0044 |
|          | 10 | 0.0000   | 0.0000          | 0.0000 | 0.0000   | 0.0000          | 0.0001 |
|          | 11 | 0.0000   | 0.0001          | 0.0000 | 0.0000   | 0.0001          | 0.2003 |
|          | 12 | 0.0000   | 0.0117          | 0.3083 | 0.0000   | 0.0000          | 0.0000 |
| NRP      | 1  | 0.0000   | 0.0000          | 0.1931 | 0.0000   | 0.0000          | 0.0000 |
|          | 2  | 0.0000   | 0.0000          | 0.0010 | 0.0000   | 0.0000          | 0.7617 |
|          | 3  | 0.0000   | 0.0000          | 0.0538 | 0.0000   | 0.0000          | 0.0769 |
|          | 4  | 0.0000   | 0.0000          | 0.7882 | 0.0002   | 0.0000          | 0.8925 |
|          | 5  | 0.0000   | 0.0000          | 0.4047 | 0.0000   | 0.0000          | 0.1103 |
|          | 6  | 0.0000   | 0.0000          | 0.3839 | 0.0000   | 0.0000          | 0.0000 |
|          | 7  | 0.0000   | 0.0000          | 0.5321 | 0.0001   | 0.0008          | 0.0000 |
|          | 8  | 0.0000   | 0.0001          | 0.1544 | 0.0000   | 0.0686          | 0.0000 |
|          | 9  | 0.0000   | 0.0000          | 0.4242 | 0.0000   | 0.0000          | 0.2002 |
|          | 10 | 0.0000   | 0.0000          | 0.6688 | 0.0000   | 0.0213          | 0.0001 |
|          | 11 | 0.0000   | 0.0000          | 0.1334 | 0.0000   | 0.0000          | 0.1948 |
|          | 12 | 0.0000   | 0.0000          | 0.7617 | 0.0000   | 0.0000          | 0.6561 |

624

625

626 Table 4. The fraction of future dry conditions over all months by GCM (Future period 1 and 2).

|                                          | GCM           | SE    | South | West  | NR    | NE    | NW    | UM    | SW    | Ohio  |
|------------------------------------------|---------------|-------|-------|-------|-------|-------|-------|-------|-------|-------|
| Future<br>period 1<br>- Dry<br>condition | BNU_ESM       | 0.575 | 0.589 | 0.511 | 0.367 | 0.436 | 0.322 | 0.467 | 0.453 | 0.492 |
|                                          | CSIRO_mk3_6_0 | 0.489 | 0.689 | 0.639 | 0.547 | 0.297 | 0.519 | 0.381 | 0.653 | 0.481 |
|                                          | GFDL_CM3      | 0.414 | 0.608 | 0.686 | 0.419 | 0.403 | 0.525 | 0.383 | 0.647 | 0.425 |
|                                          | GFDL_ESM2G    | 0.731 | 0.900 | 0.758 | 0.453 | 0.486 | 0.486 | 0.397 | 0.828 | 0.617 |
|                                          | MIROC_ESM     | 0.631 | 0.594 | 0.822 | 0.625 | 0.636 | 0.708 | 0.686 | 0.658 | 0.611 |
|                                          | MPI_ESM_LR    | 0.375 | 0.747 | 0.694 | 0.542 | 0.597 | 0.611 | 0.558 | 0.756 | 0.575 |
|                                          | MRI_CGCM3     | 0.494 | 0.592 | 0.639 | 0.400 | 0.544 | 0.553 | 0.350 | 0.547 | 0.506 |
|                                          | NorESM1_M     | 0.492 | 0.764 | 0.778 | 0.475 | 0.400 | 0.611 | 0.475 | 0.753 | 0.508 |
|                                          | BCC_CSM       | 0.728 | 0.739 | 0.828 | 0.642 | 0.603 | 0.614 | 0.564 | 0.822 | 0.656 |
| Future<br>period 2<br>- Dry<br>condition | BNU_ESM       | 0.608 | 0.775 | 0.597 | 0.400 | 0.522 | 0.461 | 0.478 | 0.522 | 0.572 |
|                                          | CSIRO_mk3_6_0 | 0.367 | 0.667 | 0.583 | 0.528 | 0.225 | 0.528 | 0.433 | 0.633 | 0.461 |
|                                          | GFDL_CM3      | 0.467 | 0.767 | 0.789 | 0.461 | 0.514 | 0.542 | 0.508 | 0.794 | 0.469 |
|                                          | GFDL_ESM2G    | 0.722 | 0.831 | 0.694 | 0.478 | 0.519 | 0.525 | 0.397 | 0.672 | 0.581 |
|                                          | MIROC_ESM     | 0.672 | 0.686 | 0.897 | 0.742 | 0.731 | 0.728 | 0.700 | 0.739 | 0.664 |
|                                          | MPI_ESM_LR    | 0.442 | 0.800 | 0.778 | 0.519 | 0.542 | 0.639 | 0.450 | 0.800 | 0.450 |
|                                          | MRI_CGCM3     | 0.508 | 0.703 | 0.581 | 0.422 | 0.481 | 0.528 | 0.439 | 0.517 | 0.556 |
|                                          | NorESM1_M     | 0.594 | 0.808 | 0.722 | 0.500 | 0.461 | 0.550 | 0.481 | 0.731 | 0.594 |
|                                          | BCC_CSM       | 0.628 | 0.697 | 0.875 | 0.708 | 0.567 | 0.708 | 0.556 | 0.825 | 0.603 |

627

628



629 Table 5. The fraction of future dry condition over all months by ET<sub>0</sub> estimation method and  
630 region (Future period 1 and 2).

|                                         | ET <sub>0</sub> | SE    | South | West  | NR    | NE    | NW    | UM    | SW    | Ohio  |
|-----------------------------------------|-----------------|-------|-------|-------|-------|-------|-------|-------|-------|-------|
| Future<br>period 1<br>-Dry<br>condition | Hargreaves      | 0.302 | 0.426 | 0.559 | 0.333 | 0.309 | 0.466 | 0.321 | 0.485 | 0.324 |
|                                         | Blaney_Criddle  | 0.738 | 0.880 | 0.898 | 0.840 | 0.738 | 0.762 | 0.784 | 0.904 | 0.769 |
|                                         | Hamon           | 0.633 | 0.818 | 0.667 | 0.531 | 0.494 | 0.497 | 0.457 | 0.713 | 0.549 |
|                                         | Kharrufa        | 0.883 | 0.957 | 0.889 | 0.636 | 0.667 | 0.698 | 0.636 | 0.886 | 0.738 |
|                                         | Irmak_Rn        | 0.522 | 0.673 | 0.694 | 0.491 | 0.512 | 0.556 | 0.494 | 0.679 | 0.580 |
|                                         | Irmak_Rs        | 0.525 | 0.722 | 0.731 | 0.463 | 0.485 | 0.546 | 0.460 | 0.679 | 0.556 |
|                                         | Dalton          | 0.364 | 0.503 | 0.583 | 0.340 | 0.343 | 0.426 | 0.296 | 0.509 | 0.380 |
|                                         | Meyer           | 0.367 | 0.531 | 0.596 | 0.346 | 0.324 | 0.435 | 0.290 | 0.512 | 0.367 |
|                                         | PM              | 0.534 | 0.685 | 0.694 | 0.472 | 0.469 | 0.525 | 0.481 | 0.676 | 0.540 |
|                                         | PT              | 0.608 | 0.719 | 0.750 | 0.515 | 0.552 | 0.590 | 0.515 | 0.753 | 0.608 |
| Future<br>period 2<br>-Dry<br>condition | Hargreaves      | 0.352 | 0.506 | 0.605 | 0.420 | 0.355 | 0.491 | 0.380 | 0.537 | 0.361 |
|                                         | Blaney_Criddle  | 0.765 | 0.907 | 0.880 | 0.877 | 0.769 | 0.818 | 0.830 | 0.901 | 0.806 |
|                                         | Hamon           | 0.633 | 0.861 | 0.679 | 0.552 | 0.491 | 0.528 | 0.460 | 0.719 | 0.574 |
|                                         | Kharrufa        | 0.883 | 0.954 | 0.898 | 0.704 | 0.713 | 0.728 | 0.682 | 0.883 | 0.784 |
|                                         | Irmak_Rn        | 0.515 | 0.738 | 0.710 | 0.494 | 0.491 | 0.574 | 0.503 | 0.685 | 0.543 |
|                                         | Irmak_Rs        | 0.534 | 0.796 | 0.753 | 0.485 | 0.497 | 0.562 | 0.478 | 0.719 | 0.562 |
|                                         | Dalton          | 0.349 | 0.596 | 0.620 | 0.389 | 0.358 | 0.475 | 0.315 | 0.540 | 0.373 |
|                                         | Meyer           | 0.352 | 0.596 | 0.630 | 0.383 | 0.349 | 0.488 | 0.309 | 0.546 | 0.361 |
|                                         | PM              | 0.543 | 0.744 | 0.701 | 0.475 | 0.485 | 0.531 | 0.463 | 0.679 | 0.528 |
|                                         | PT              | 0.639 | 0.784 | 0.765 | 0.509 | 0.562 | 0.593 | 0.515 | 0.716 | 0.608 |

631

632 Table 6. The fraction of future dry condition over all months by RCP trajectory and region  
633 (Future period 1 and 2).

|                                         | RCP | SE    | South | West  | NR    | NE    | NW    | UM    | SW    | Ohio  |
|-----------------------------------------|-----|-------|-------|-------|-------|-------|-------|-------|-------|-------|
| Future<br>period 1<br>-Dry<br>condition | 2.6 | 0.551 | 0.657 | 0.665 | 0.507 | 0.502 | 0.543 | 0.495 | 0.644 | 0.553 |
|                                         | 4.5 | 0.553 | 0.698 | 0.739 | 0.515 | 0.475 | 0.554 | 0.482 | 0.731 | 0.556 |
|                                         | 8.5 | 0.539 | 0.719 | 0.715 | 0.468 | 0.491 | 0.554 | 0.443 | 0.665 | 0.515 |
| Future<br>period 2<br>-Dry<br>condition | 2.6 | 0.516 | 0.649 | 0.657 | 0.486 | 0.524 | 0.515 | 0.465 | 0.617 | 0.545 |
|                                         | 4.5 | 0.490 | 0.731 | 0.712 | 0.510 | 0.476 | 0.584 | 0.494 | 0.658 | 0.528 |
|                                         | 8.5 | 0.664 | 0.864 | 0.803 | 0.590 | 0.520 | 0.637 | 0.521 | 0.803 | 0.577 |

634

## US Climate Regions

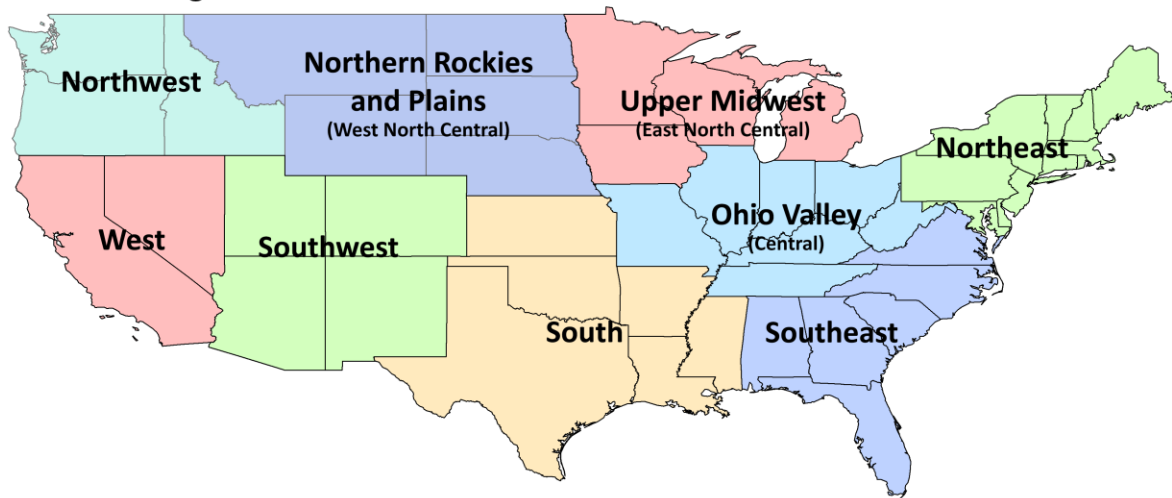

635

636 Figure 1. US climate regions identified by National Climate Data Center (Adapted from Karl and

637 Koss, 1984, <https://www.ncdc.noaa.gov/monitoring-references/maps/us-climate-regions.php>)

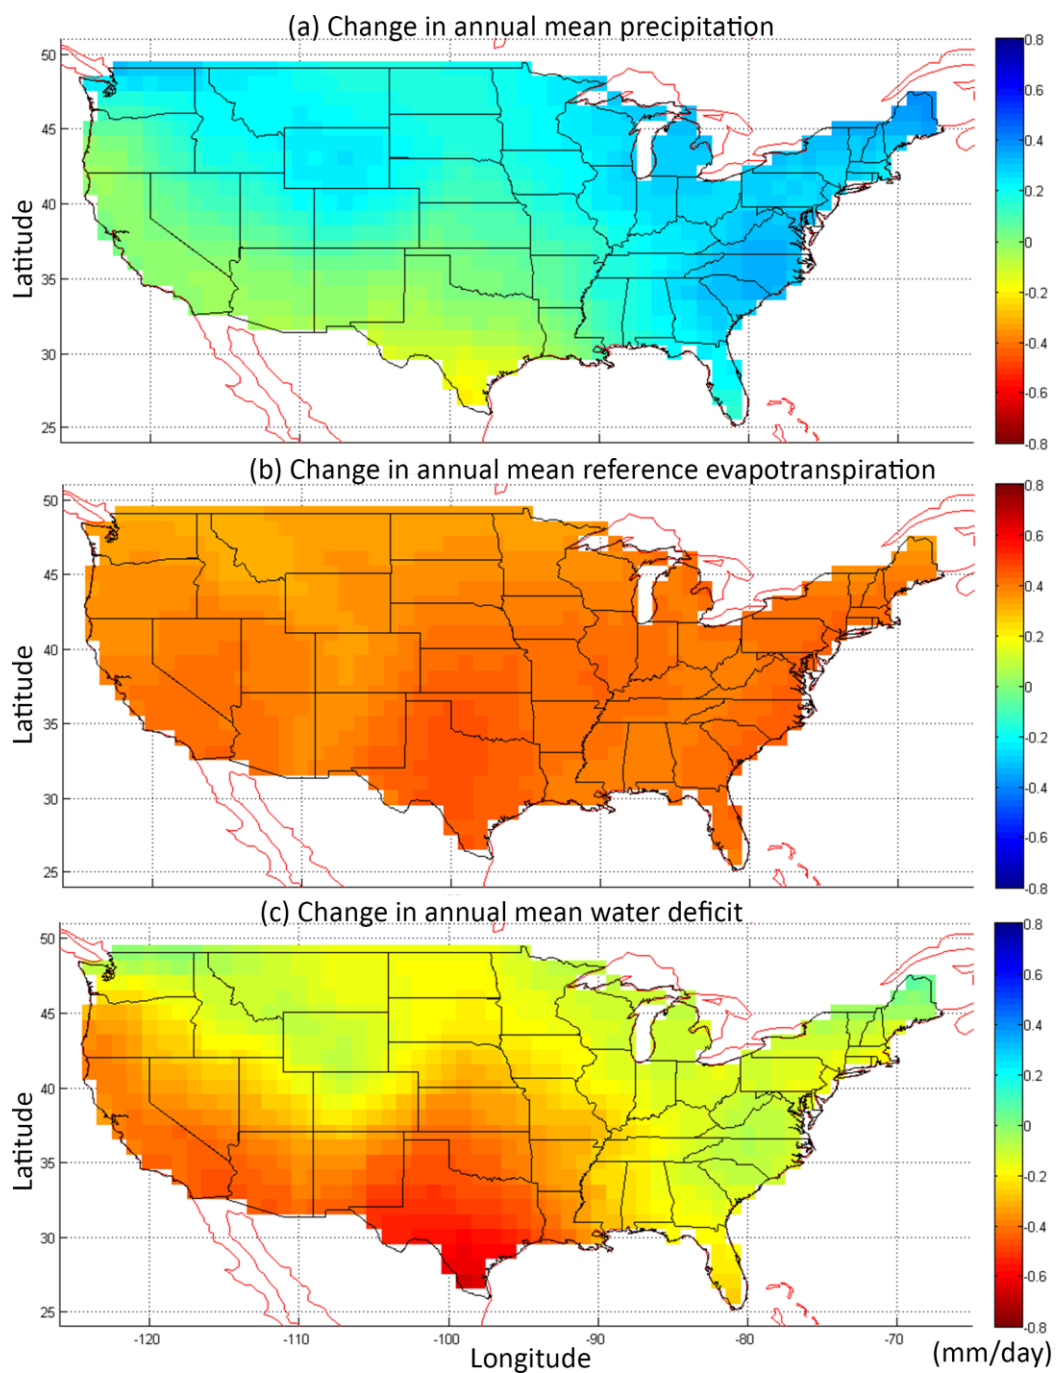

Figure 2. The change in the annual mean (a)  $P$ , (b)  $ET_0$ , and (c)  $P - ET_0$  over U.S. All units are mm/day and the change is defined as the mean of 2070-2100 minus that of 1950-2005. These changes are averaged over all GCMs,  $ET_0$  estimation methods, and RCP trajectories.

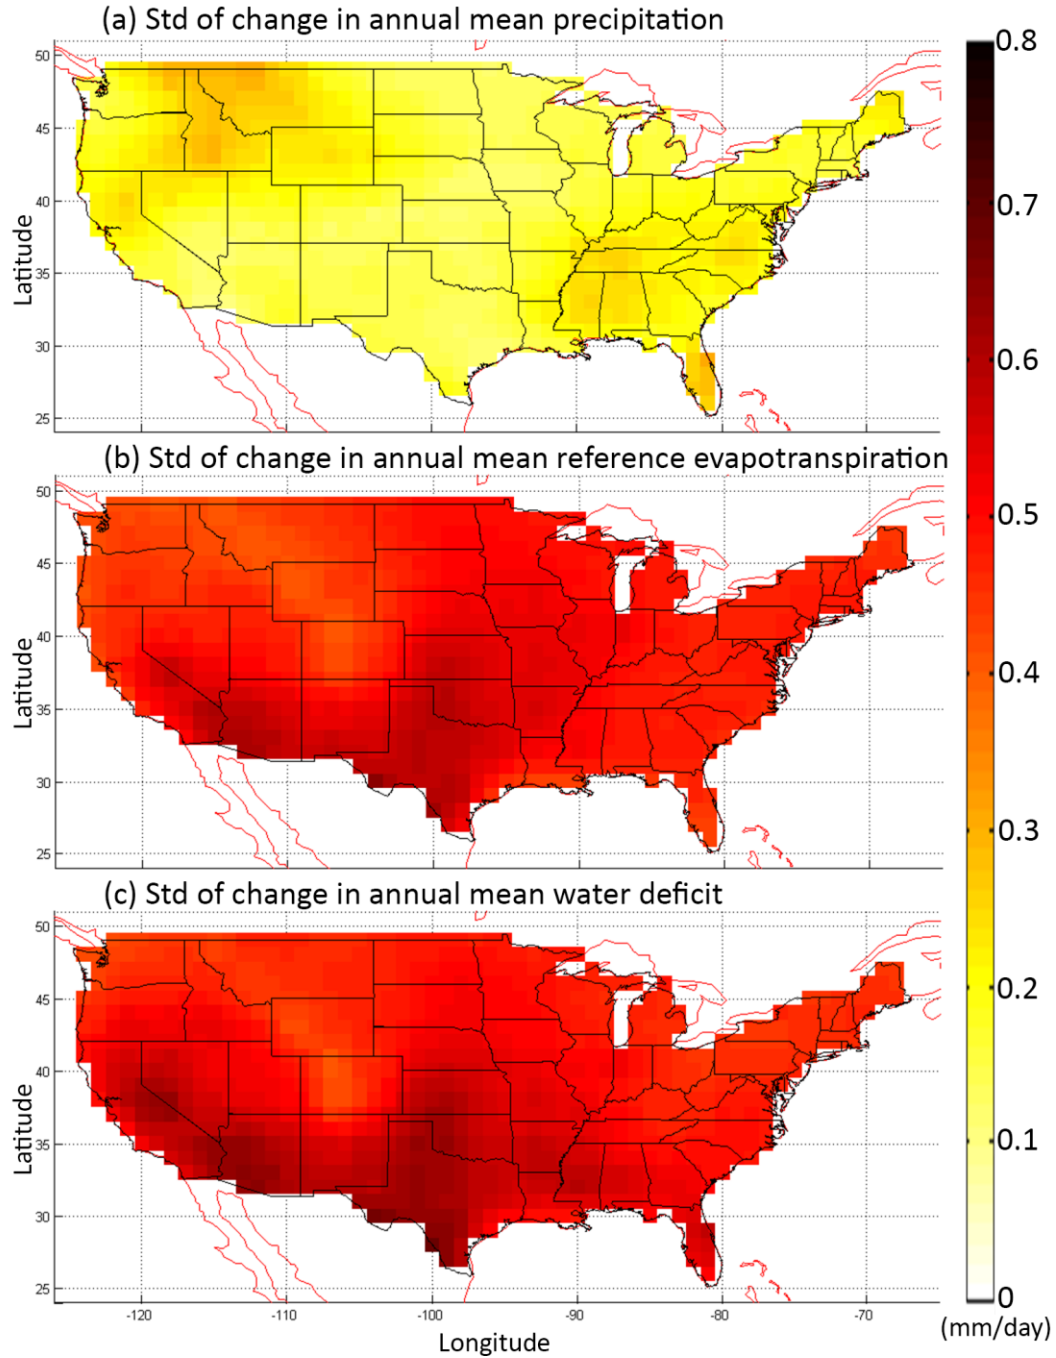

Figure 3. The standard deviation of the change in the annual mean (a)  $P$ , (b)  $ET_0$ , and (c)  $P - ET_0$  over U.S. All units are mm/day and the change is defined as the average of 2070-2100 minus that of 1950-2005. The standard deviations are estimated over all GCMs,  $ET_0$  estimation methods, and RCP trajectories.

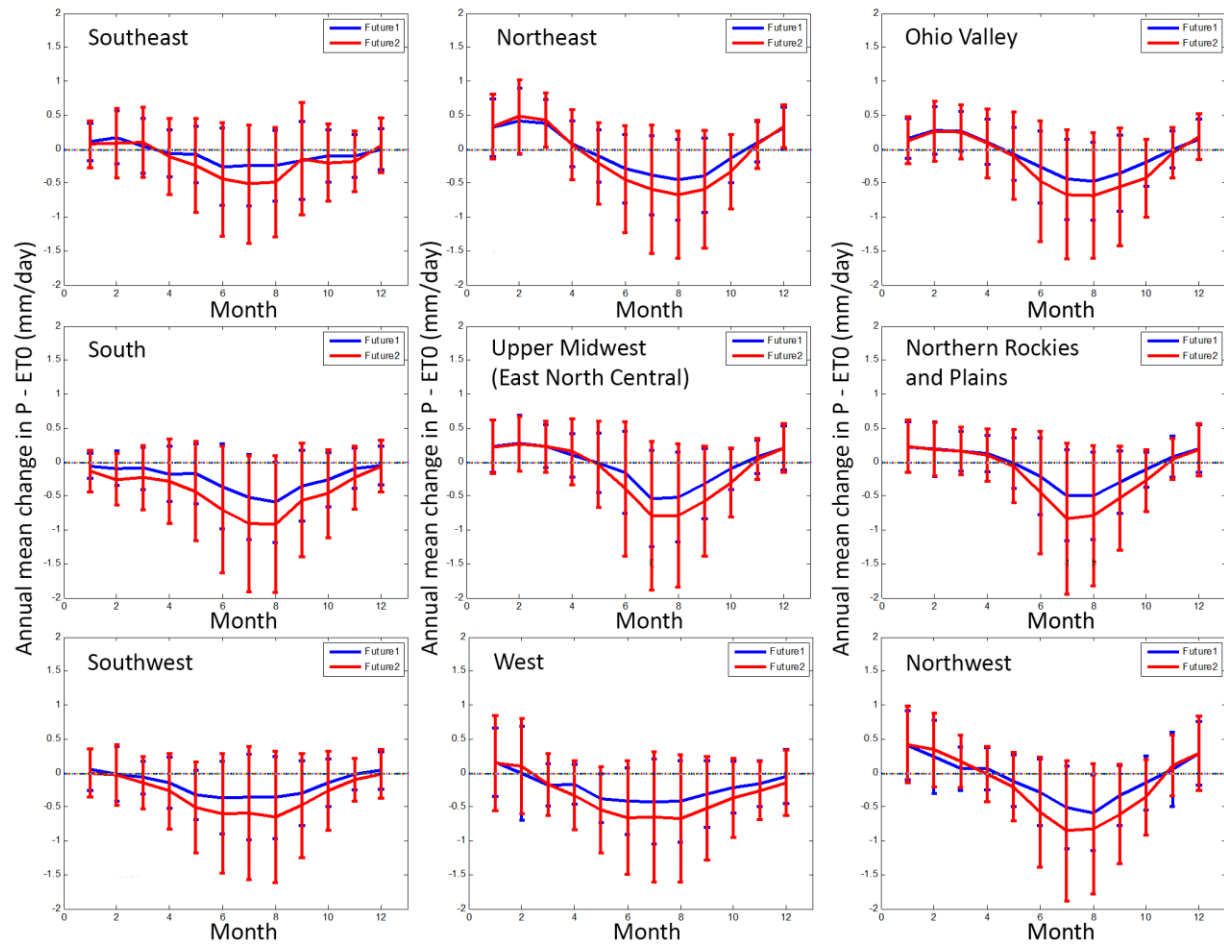

Figure 4. The change of monthly mean water deficit ( $P - ET_0$ ) over 9 different regions. Blue lines represent future 1 period (2030-2060), and red lines represent future 2 period (2070-2100). Error bars represent one standard deviation of each values. The change is defined as the mean of future periods minus that of retrospective period (1950-2005).

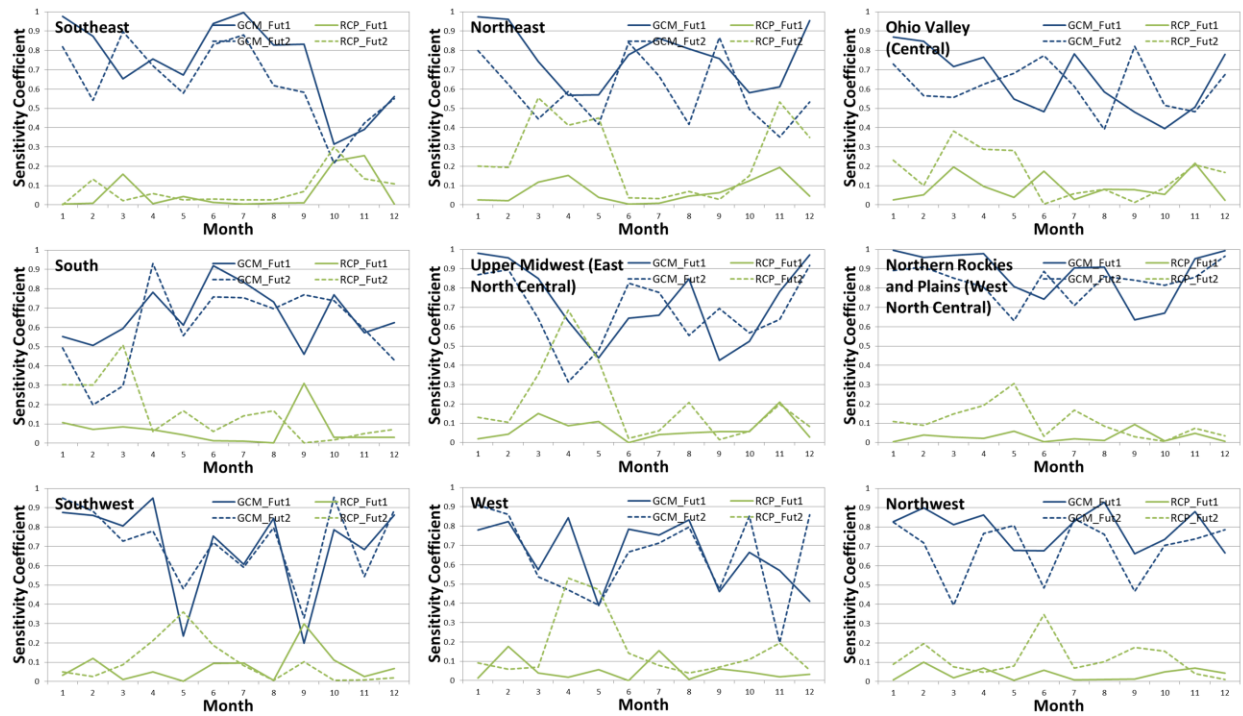

Figure 5. First order sensitivity analysis results of change in precipitation. Solid lines represent the future period 1 (2030-2060) and dotted lines represent the future period 2 (2070-2100). Blue lines represent the first order effect of GCMs and green lines represent the first order effect of RCPs.

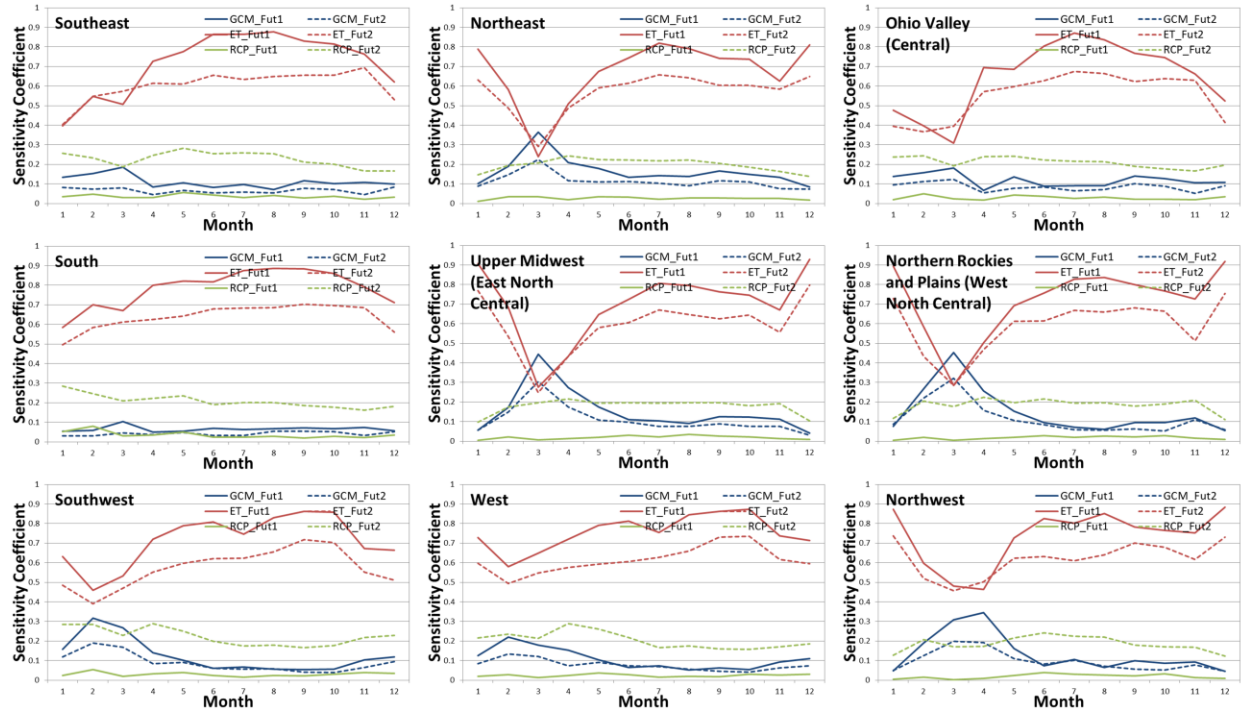

Figure 6. First order sensitivity analysis results of change in reference evapotranspiration. Solid lines represent the future period 1 (2030-2060) and dotted lines represent the future period 2 (2070-2100). Blue lines represent the first order effect of GCMs, red lines represent the first order effect of  $ET_0$  estimation methods and green lines represent the first order effect of RCPs.



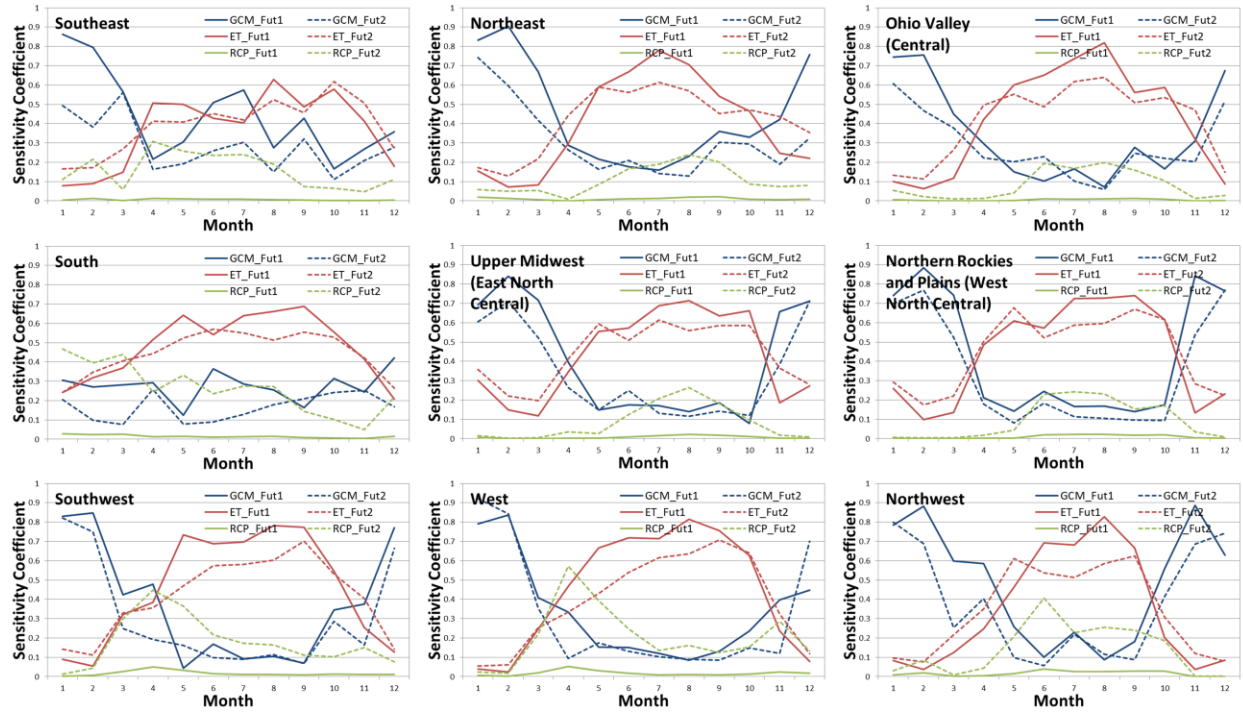

Figure 7. First order sensitivity analysis results of change in  $P - ET_0$ . Solid lines represent the future period 1 (2030-2060) and dotted lines represent the future period 2 (2070-2100). Blue lines represent the first order effect of GCMs, red lines represent the first order effect of  $ET_0$  estimation methods and green lines represent the first order effect of RCPs.

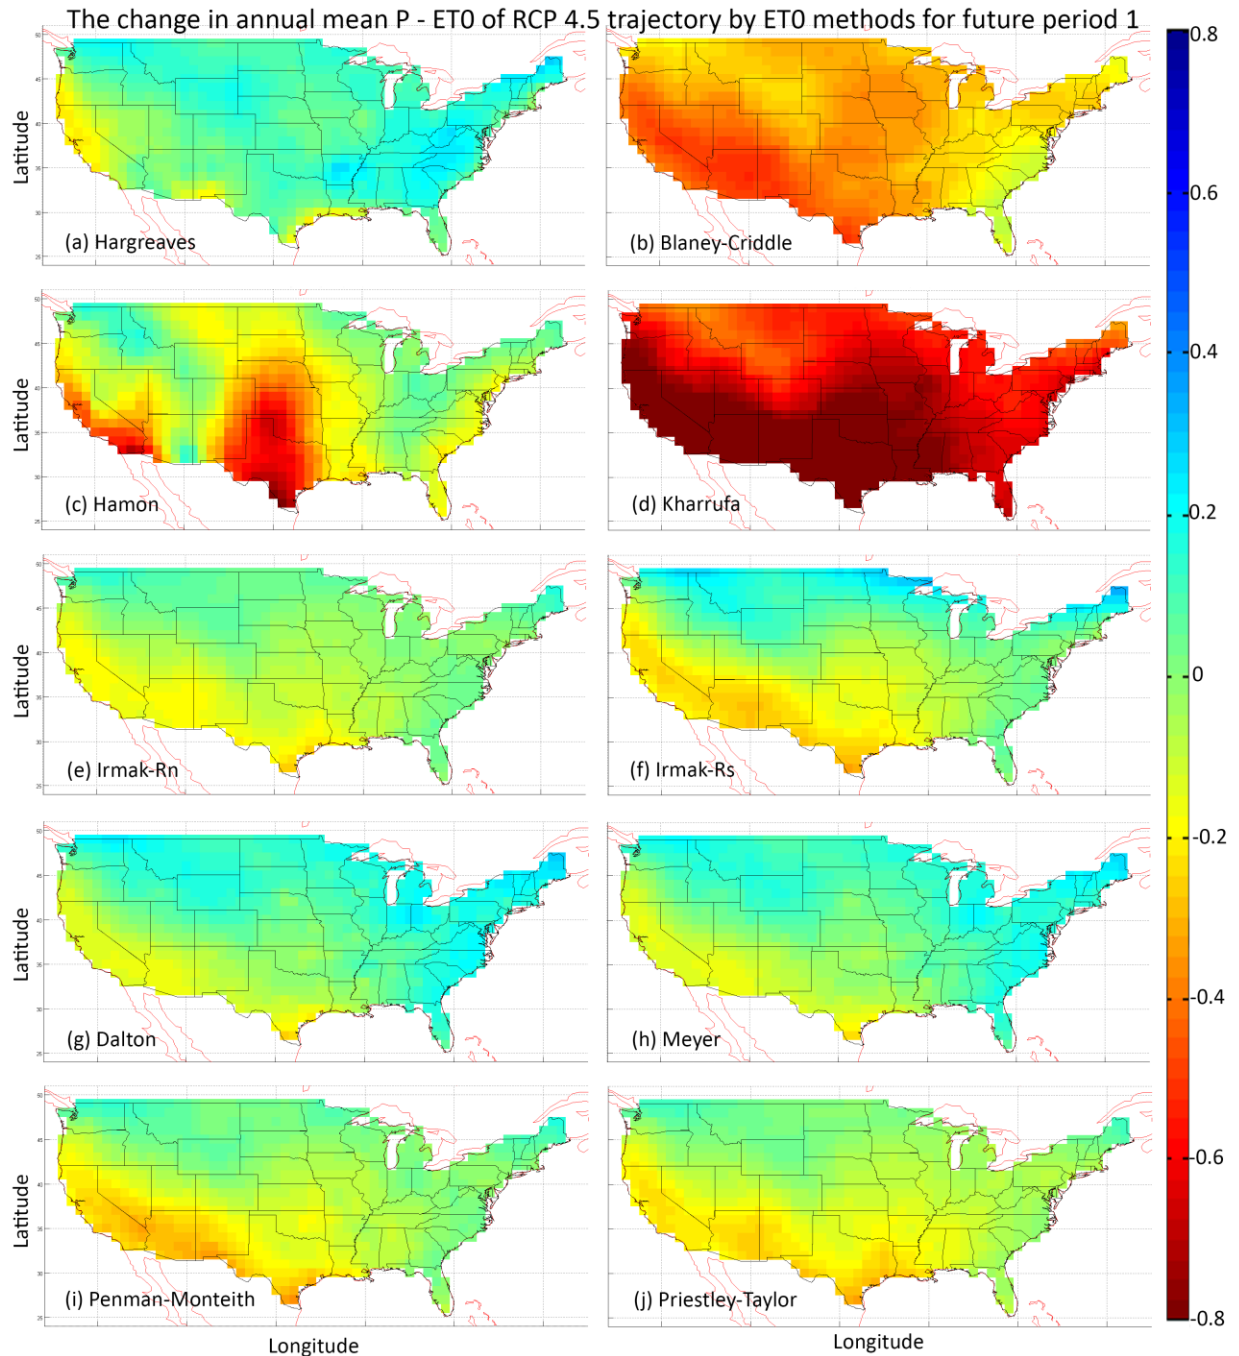

Figure 8. The change in the annual mean P – ET<sub>0</sub> of RCP 4.5 scenario by 10 different evapotranspiration methods. All units are mm/day and the change is defined as the mean of 2030-2060 minus that of 1950-2005. (All results are interpolated to 1 degree \* 1 degree grids and averaged over 9 different GCMs)

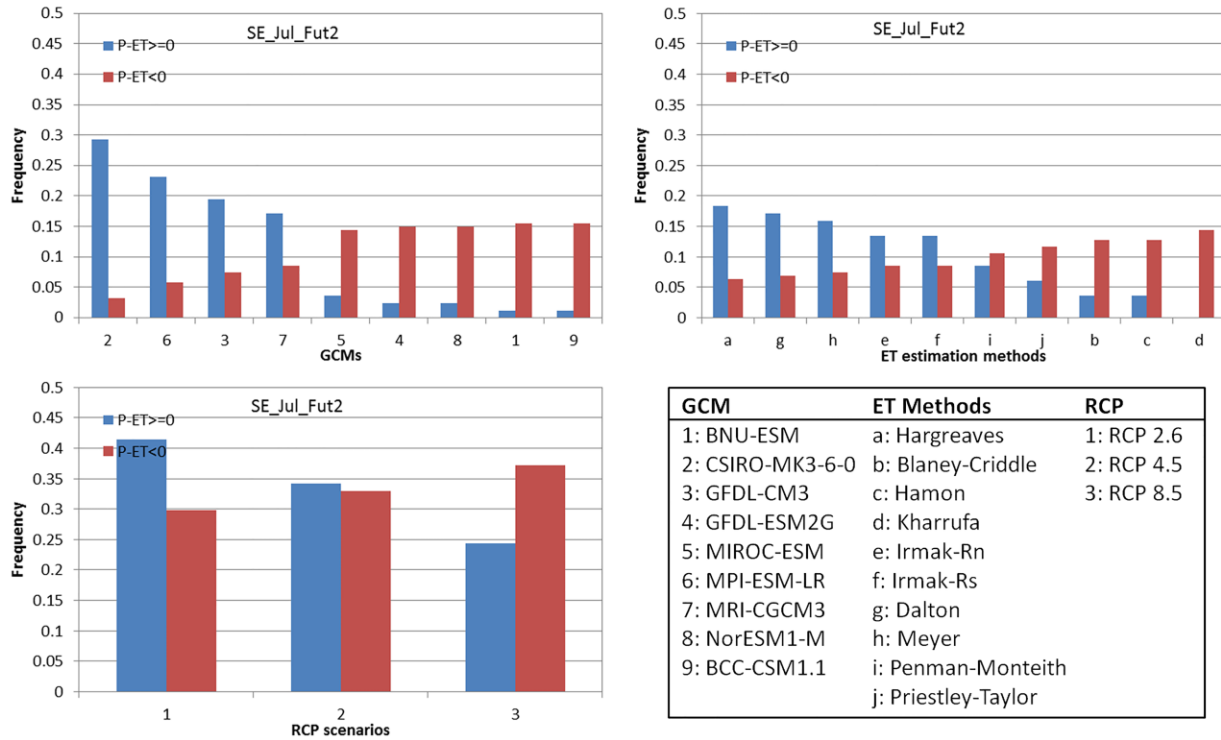

677

678 Figure 9. Histograms for projected future 2 wet conditions and dry conditions in the Southeast  
 679 US by GCM,  $ET_0$  method and RCP trajectory for the month of July.

680

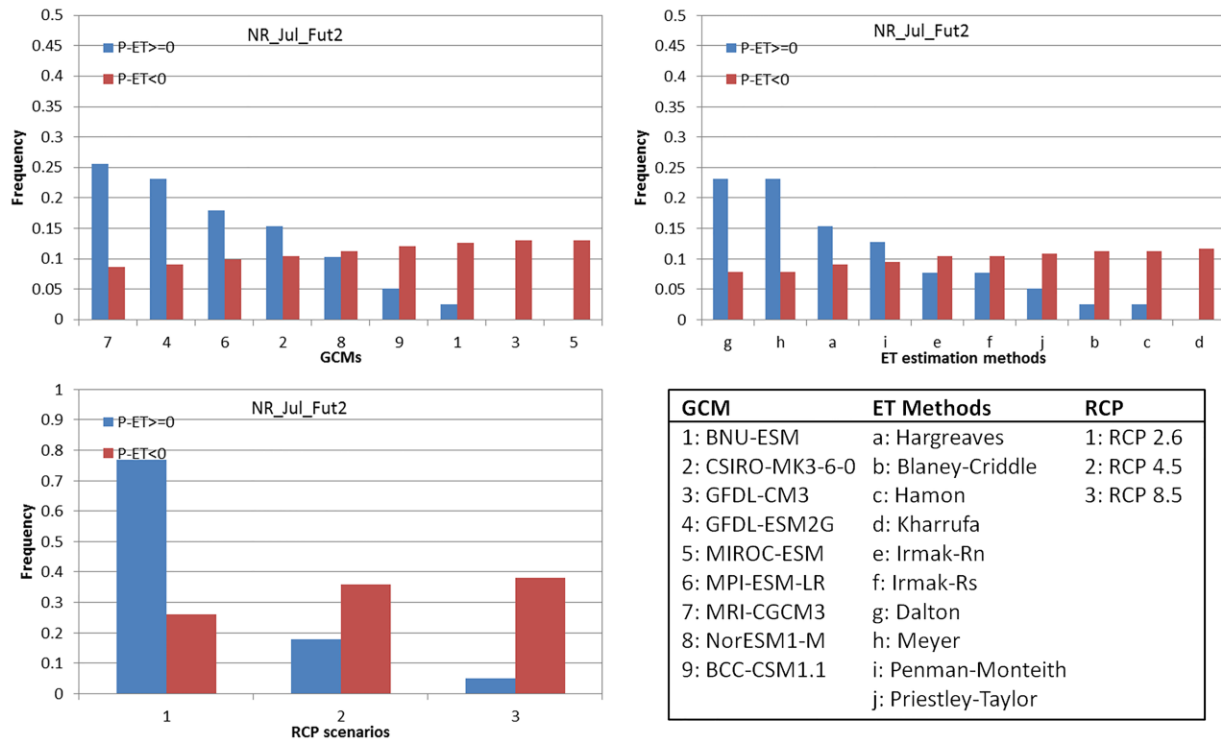

Figure 10. Histograms for projected future 2 wet conditions and dry conditions in the Northern Rockies and Plains US by GCM,  $ET_0$  method and RCP trajectory for the month of July.

Appendix A: Supplemental figures

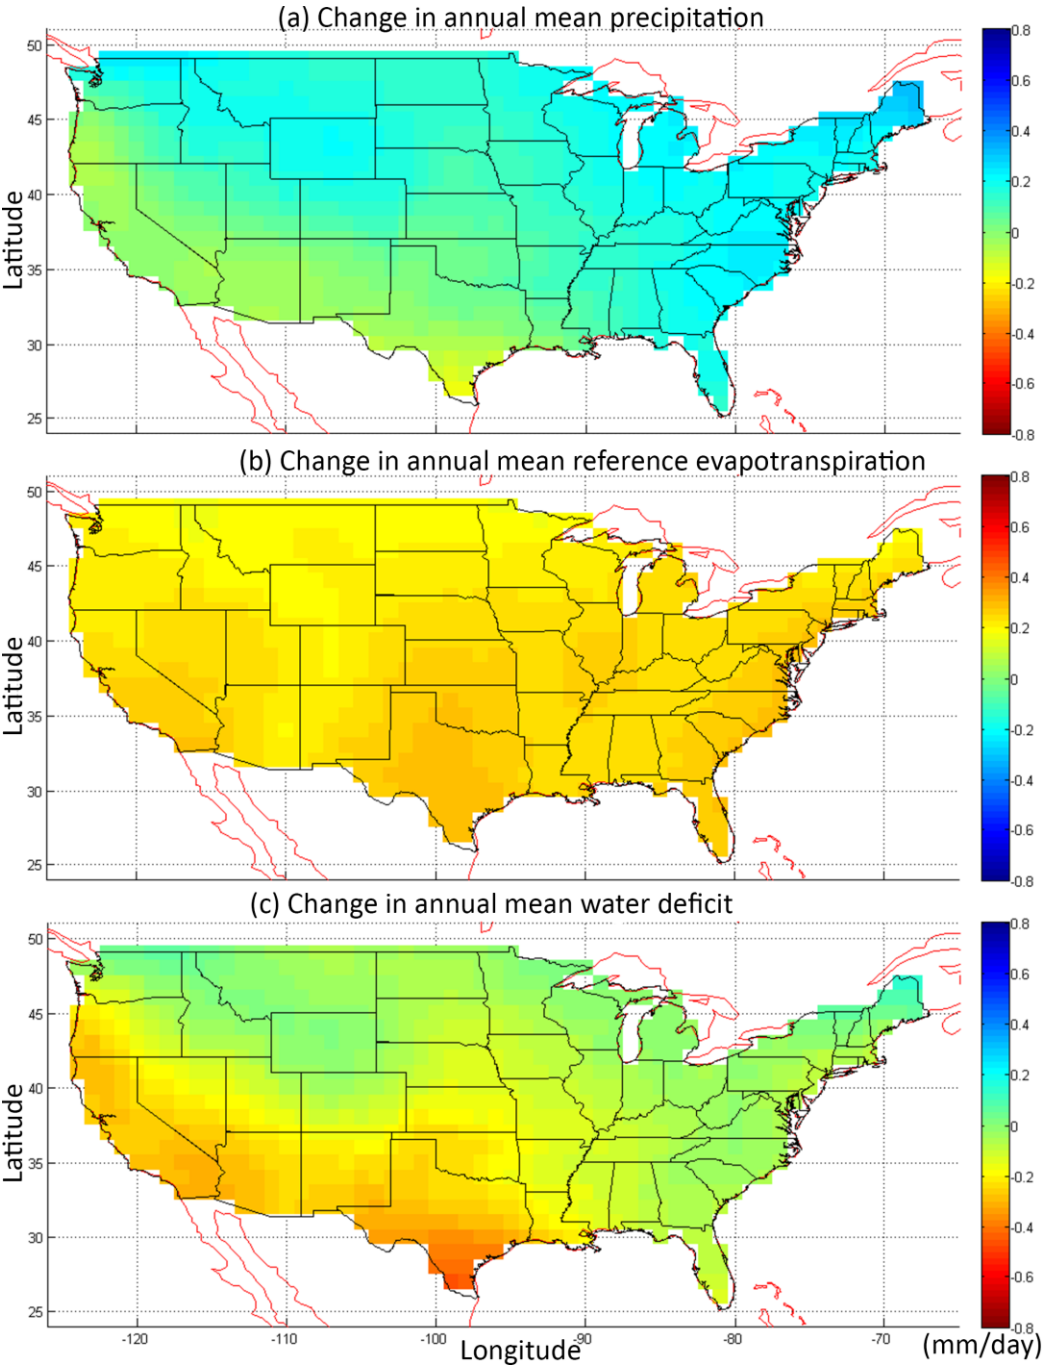

Fig. S-1 The change in the annual mean (a)  $P$ , (b)  $ET_0$ , and (c)  $P - ET_0$  over U.S. All units are mm/day and the trend is defined as the average of 2030-2060 minus that of 1950-2005.

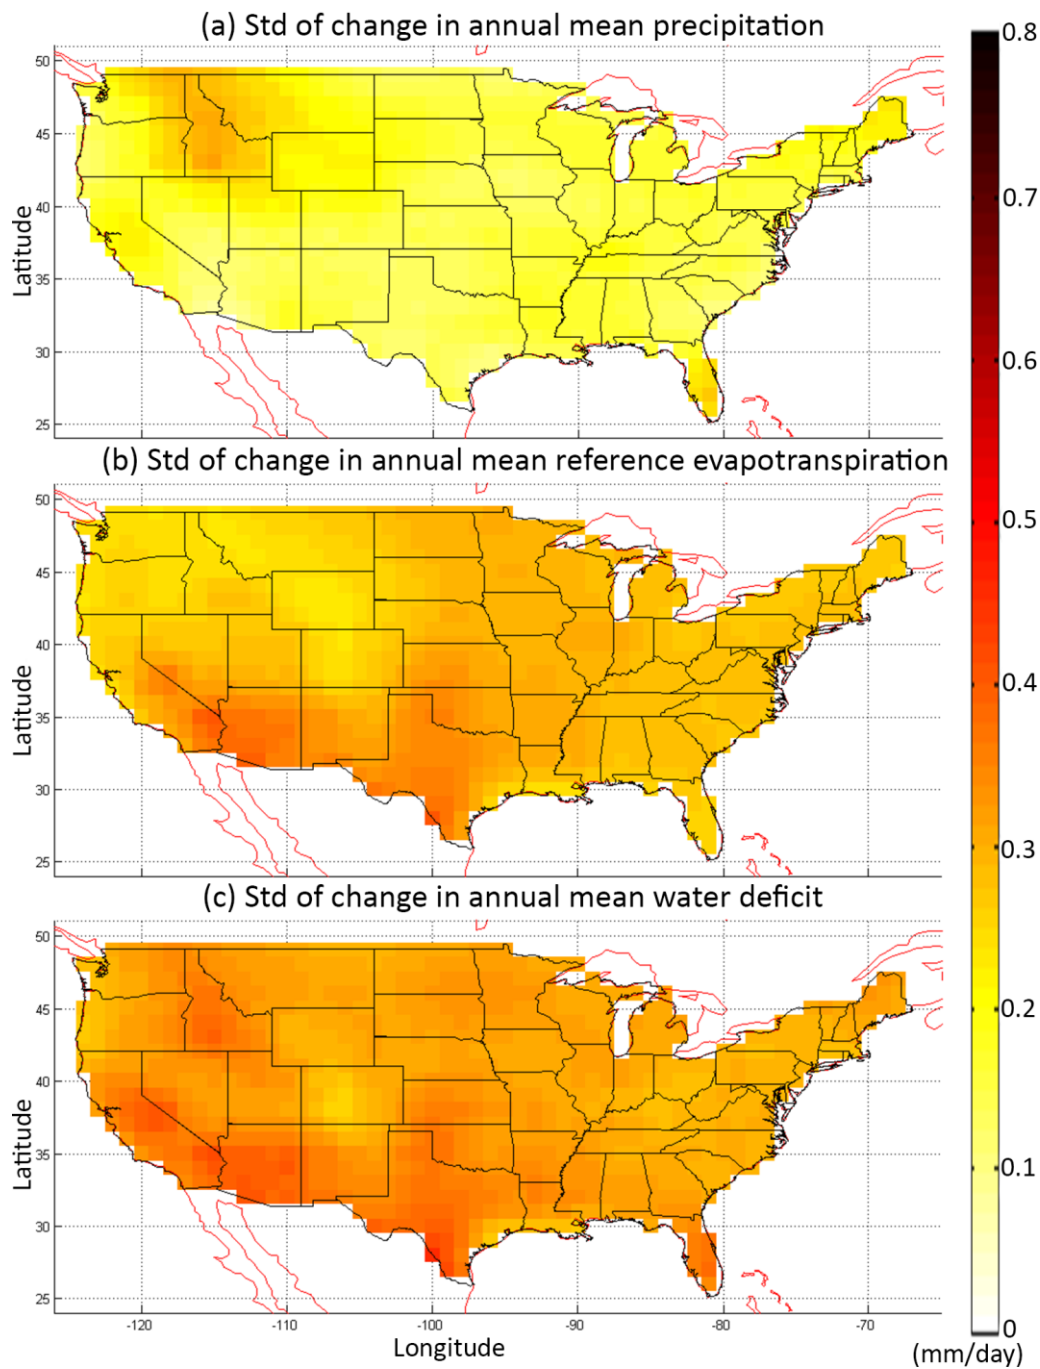

Fig. S-2 The standard deviation of the change in the annual mean (a)  $P$ , (b)  $ET_0$ , and (c)  $P - ET_0$  over U.S. All units are mm/day and the trend is defined as the average of 2030-2060 minus that of 1950-2005.

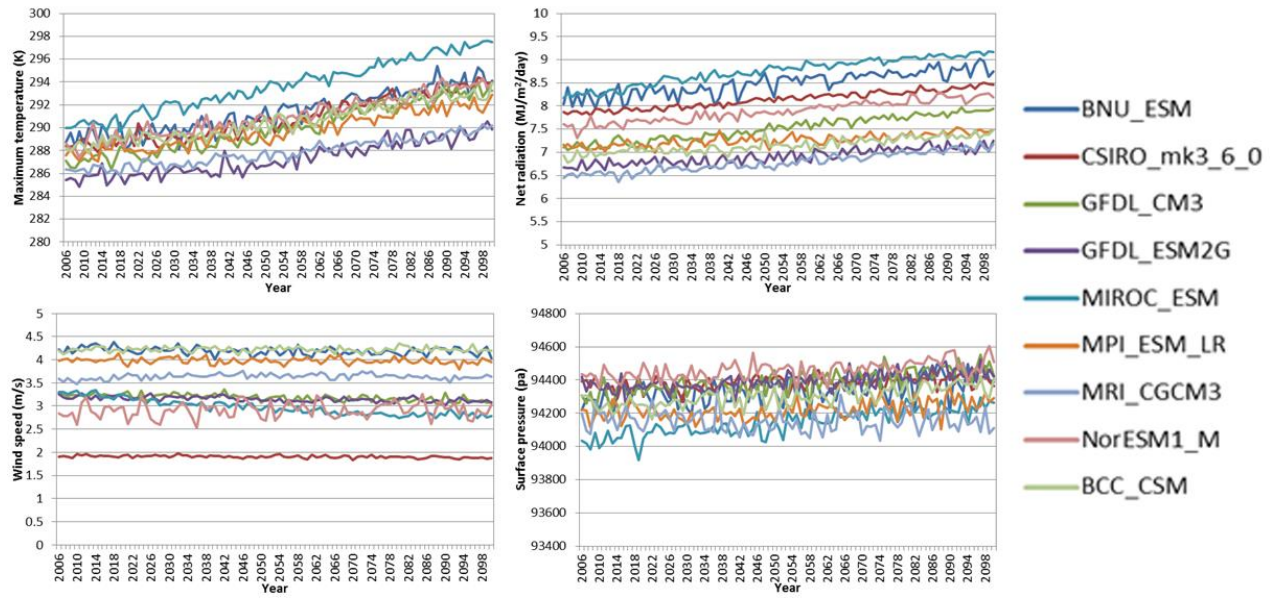

Fig. S-3 Mean maximum temperature, net radiation, wind speed at 2 m surface, and surface pressure of CMIP5 for future period (RCP 8.5).
